# Supplementary material for: Phosphorus–nitrogen compounds. Part 73. Dispiromono and dispirobicyclotetraphosphazene derivatives: syntheses, and spectroscopic, crystallographic and thermal studies
Source: Royal Society of Chemistry journal article supplement (doi:10.1039/d4nj00569d), 2024-01-01
Supplement: d4nj00569d1.pdf [file d4nj00569d1.pdf]

**Phosphorus-nitrogen Compounds. Part 73. Dispiromono and Dispirobicyclotetraphosphazene Derivatives: Syntheses, Spectroscopic, Crystallographic and Thermal Studies**

**Gamze Elmas<sup>\*a</sup>, Aytuğ Okumuş<sup>\*a</sup>, Zeynel Kılıç<sup>a</sup>, Tuncer Hökelek<sup>b</sup>**

<sup>a</sup>

<sup>a</sup>*Department of Chemistry, Ankara University, 06100 Ankara, Türkiye*

<sup>b</sup>*Department of Physics, Hacettepe University, 06800 Ankara, Türkiye*

**Electronic supplementary information (ESI)**

**Contents**

|                                                                                                                                             |           |
|---------------------------------------------------------------------------------------------------------------------------------------------|-----------|
| <b>Figure S1.</b> The ESI-MS spectra of (a) <b>6a</b> and (b) <b>7a</b> .....                                                               | <b>2</b>  |
| <b>Figure S2.</b> (a) Experimental and (b) simulated <sup>31</sup> P { <sup>1</sup> H} spectrum of the pure monocyclic <b>4d</b> .....      | <b>3</b>  |
| <b>Figure S3.</b> The conformations of (a) the tetramer ring and (b) the five-membered spiro ring and (c) packing diagram of <b>2</b> ..... | <b>4</b>  |
| <b>Figure S4.</b> The conformations of (a) the tetramer ring, (b) the five-membered spiro rings and (c) packing diagram of <b>4c</b> .....  | <b>5</b>  |
| <b>Figure S5.</b> TG curves of the cyclotetraphosphazenes ( <b>2</b> , <b>3</b> , <b>4d</b> and <b>5b</b> ).....                            | <b>6</b>  |
| <b>Figure S6.</b> TG curves of the cyclotetraphosphazenes ( <b>4c</b> and <b>5c</b> ).....                                                  | <b>7</b>  |
| <b>Section S1.</b> ESI-MS, NMR and FTIR spectra of the compounds.....                                                                       | <b>8</b>  |
| <b>Section S2.</b> Single crystal X-ray structure determinations.....                                                                       | <b>27</b> |

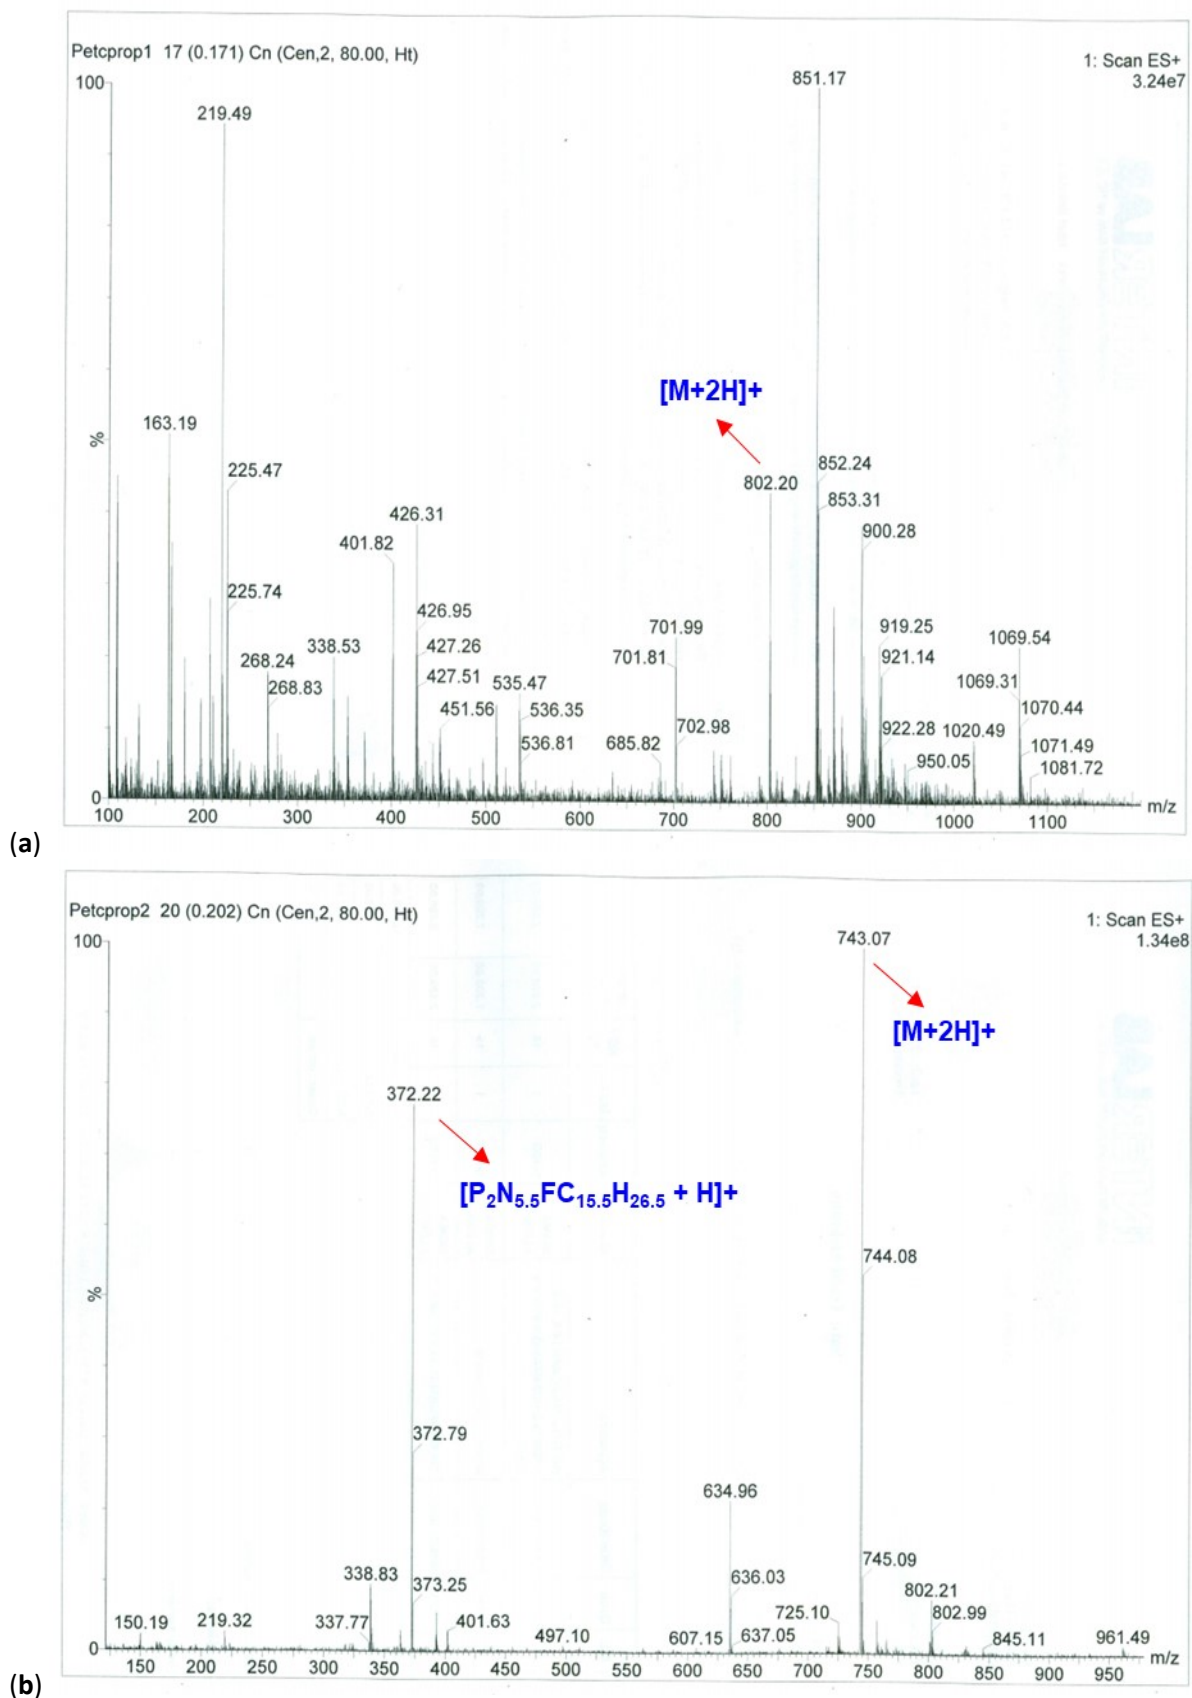

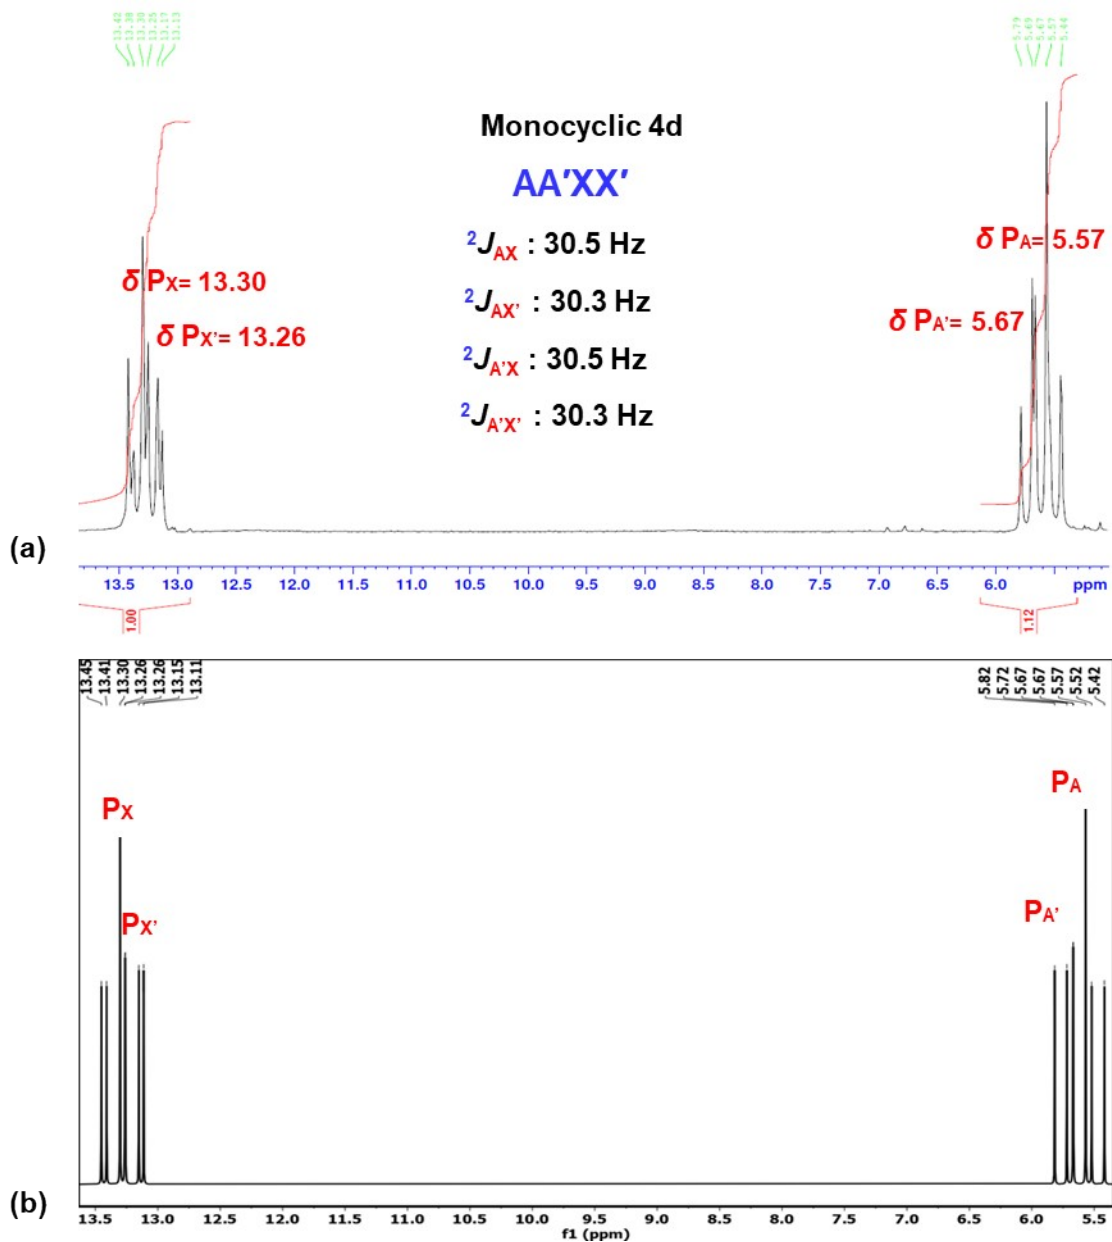

**Figure S2.** (a) In  $\text{CDCl}_3$ , the experimental and (b) simulated  ${}^{31}\text{P} \{^1\text{H}\}$  spectrum of the pure monocyclic **4d**.

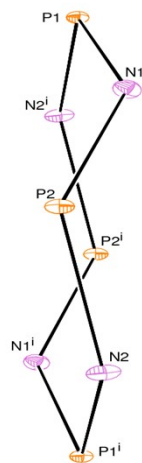

(a)

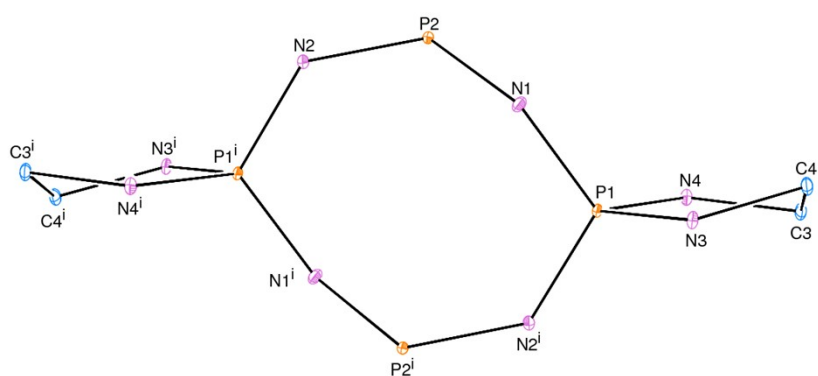

(b)

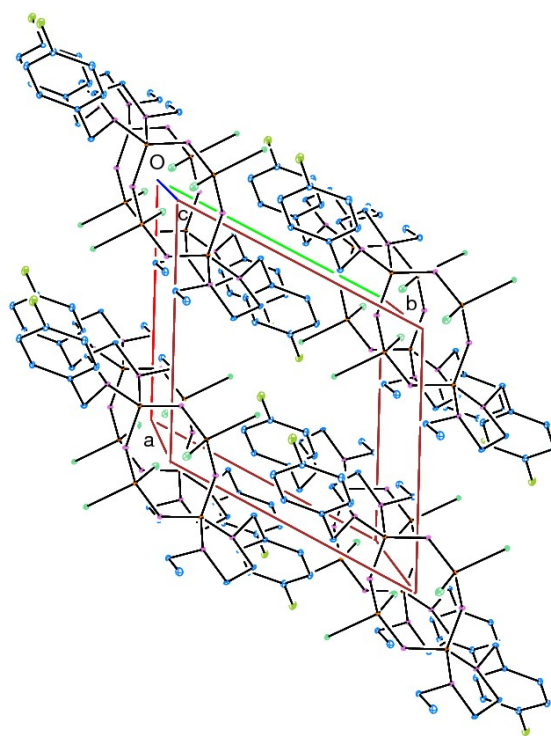

(c)

**Figure S3.** The conformations of (a) the tetramer ring, (b) the five-membered spiro ring and (c) packing diagram of **2**.

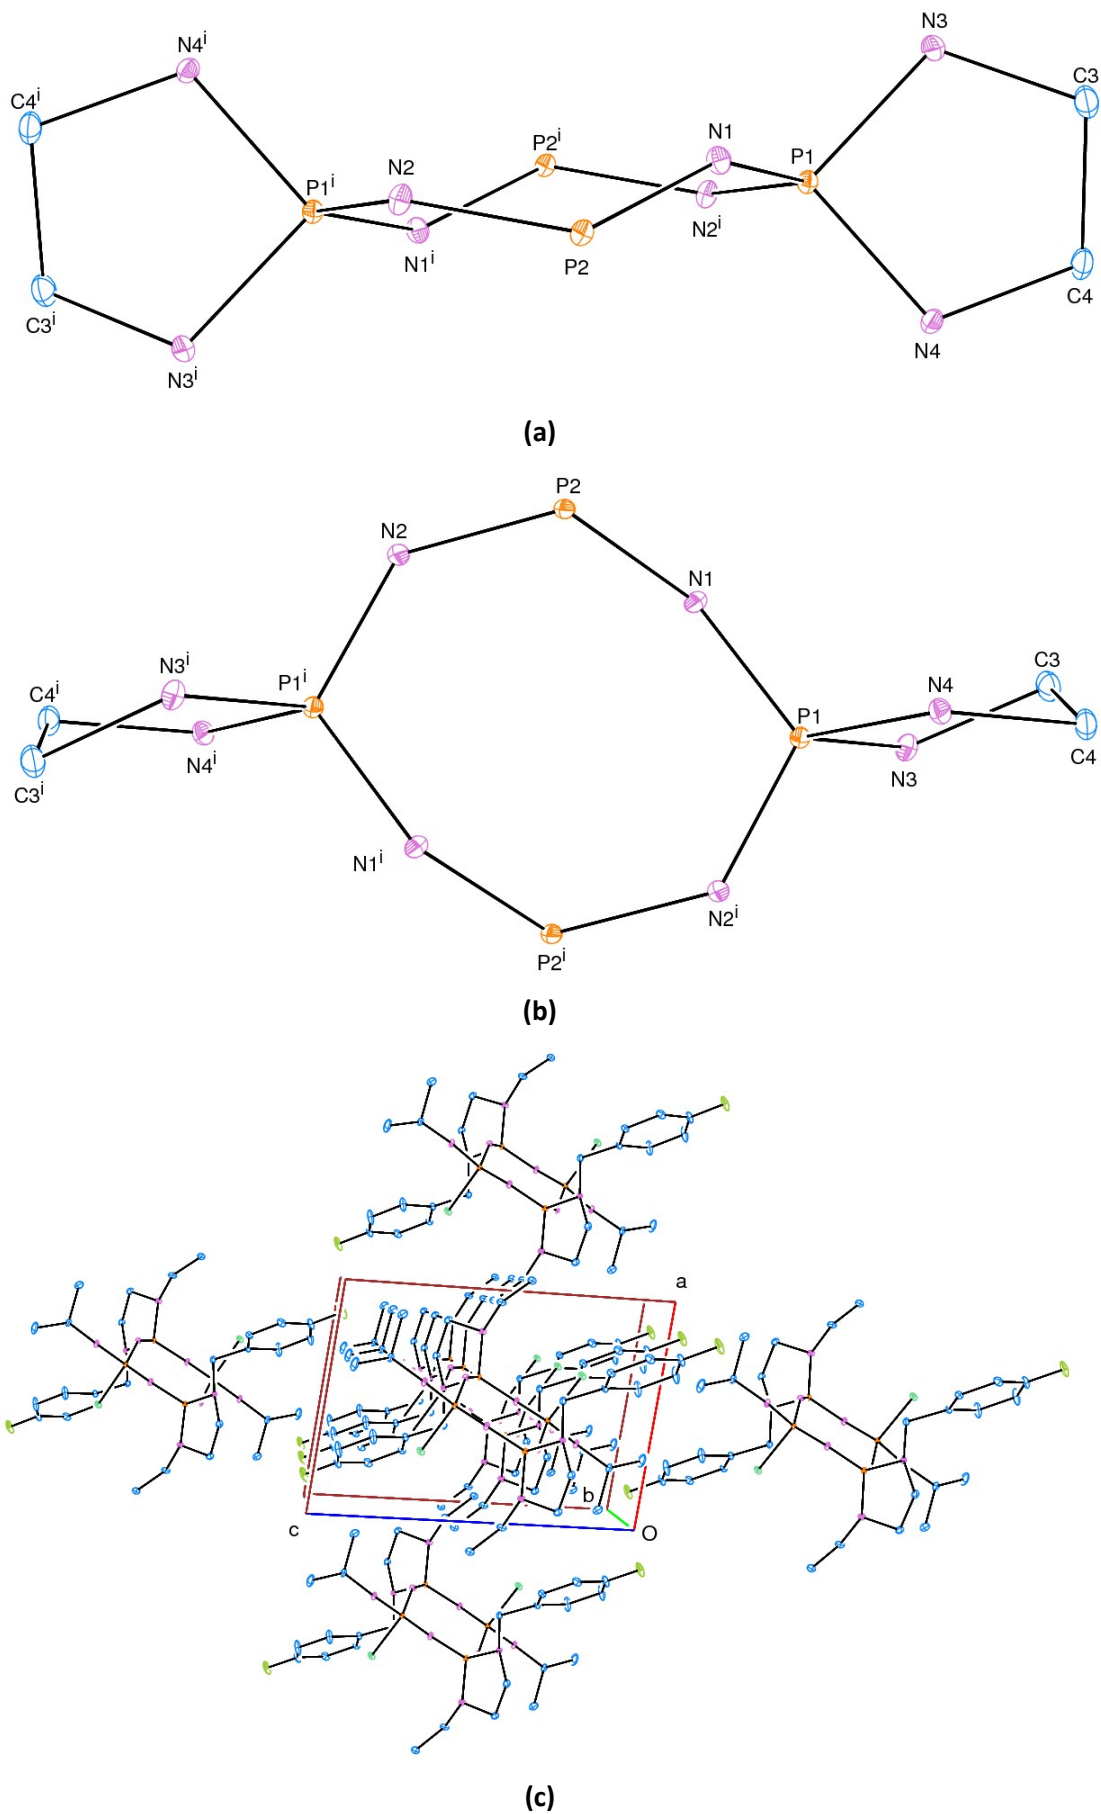

**Figure S4.** The conformations of (a) the tetramer ring, (b) the five-membered spiro ring and (c) packing diagram of **4c**.

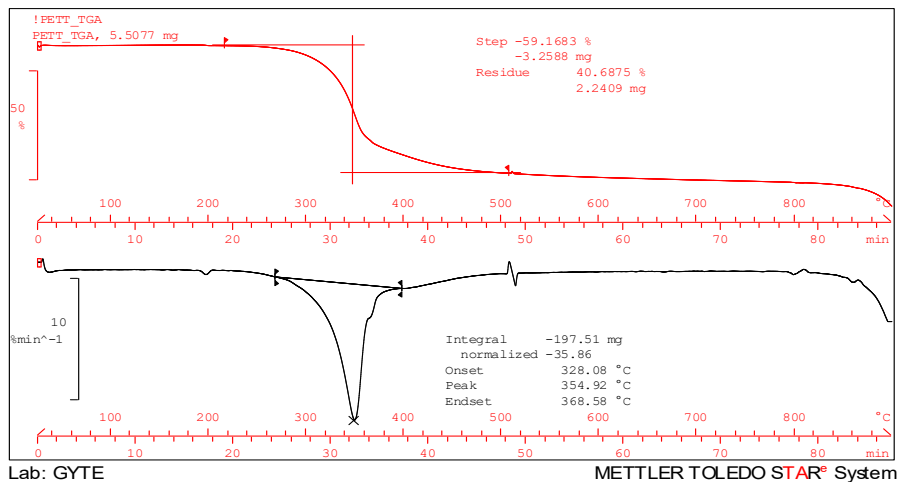

2

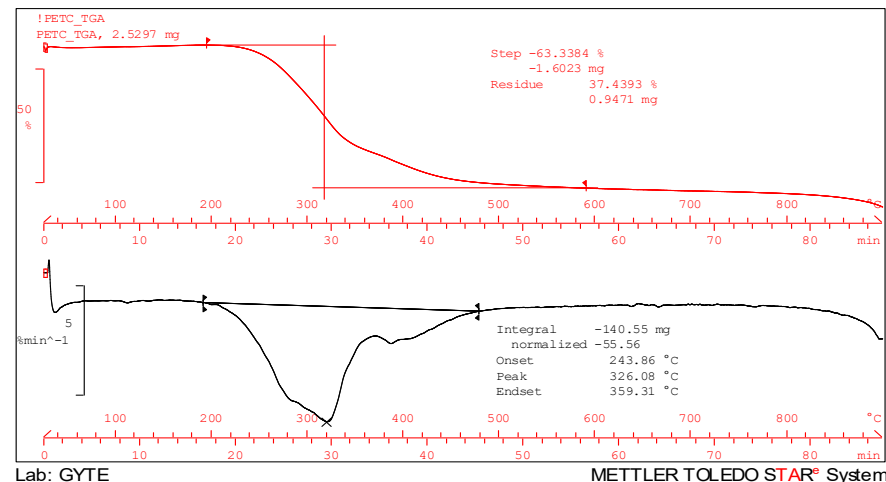

3

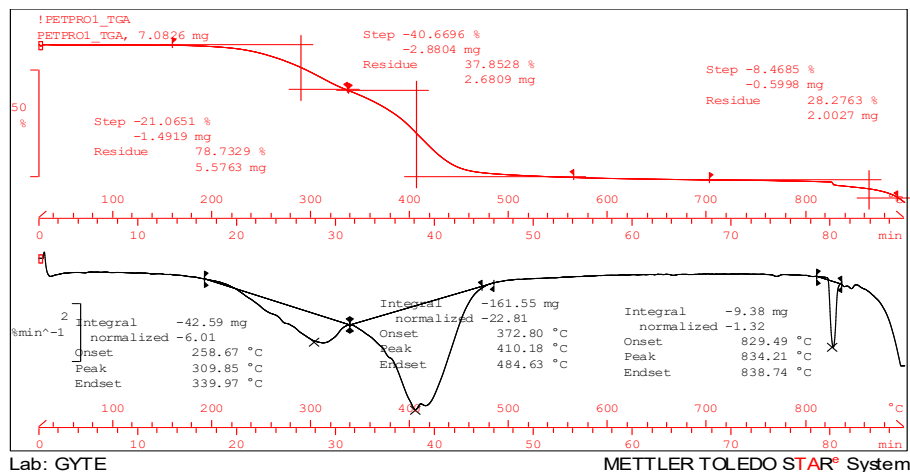

4d

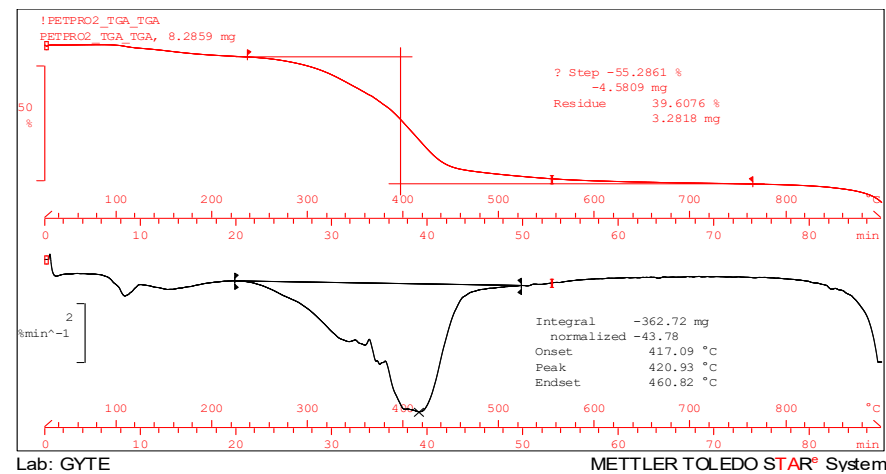

5b

Figure S5. TG curves of the cyclotetraphosphazenes (2, 3, 4d and 5b).

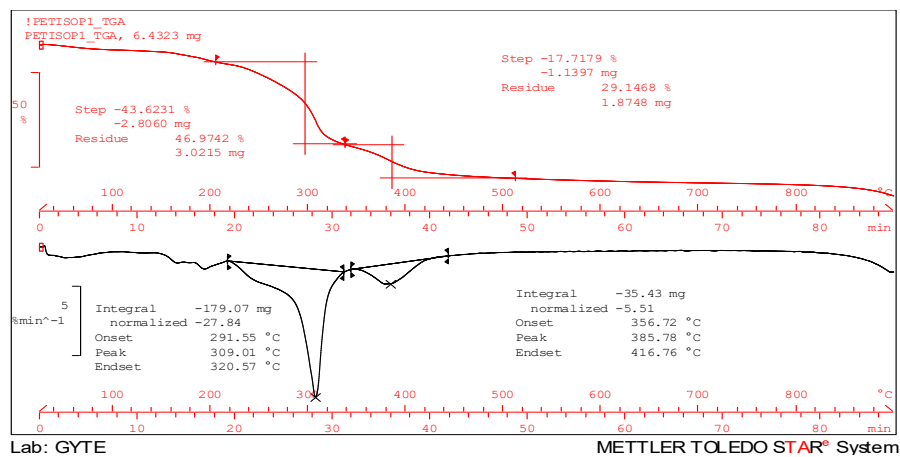

4c

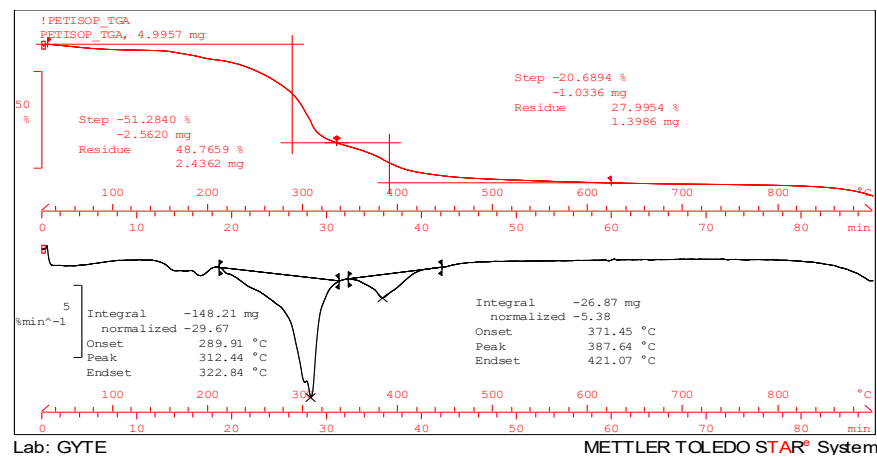

5c

Figure S6. TG curves of the cyclotetraphosphazenes (4c and 5c).

## Section S1. ESI-MS, NMR and FTIR spectra of the compounds

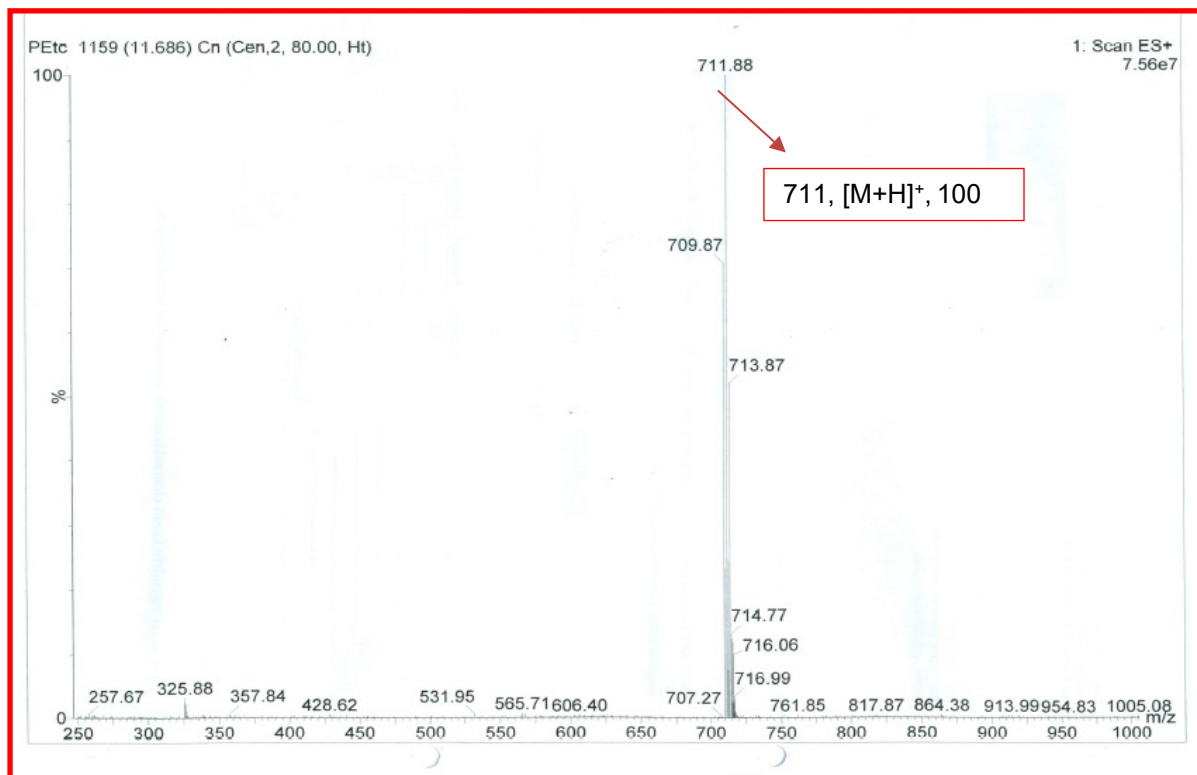

ESI-MS spectra of compound **3**.

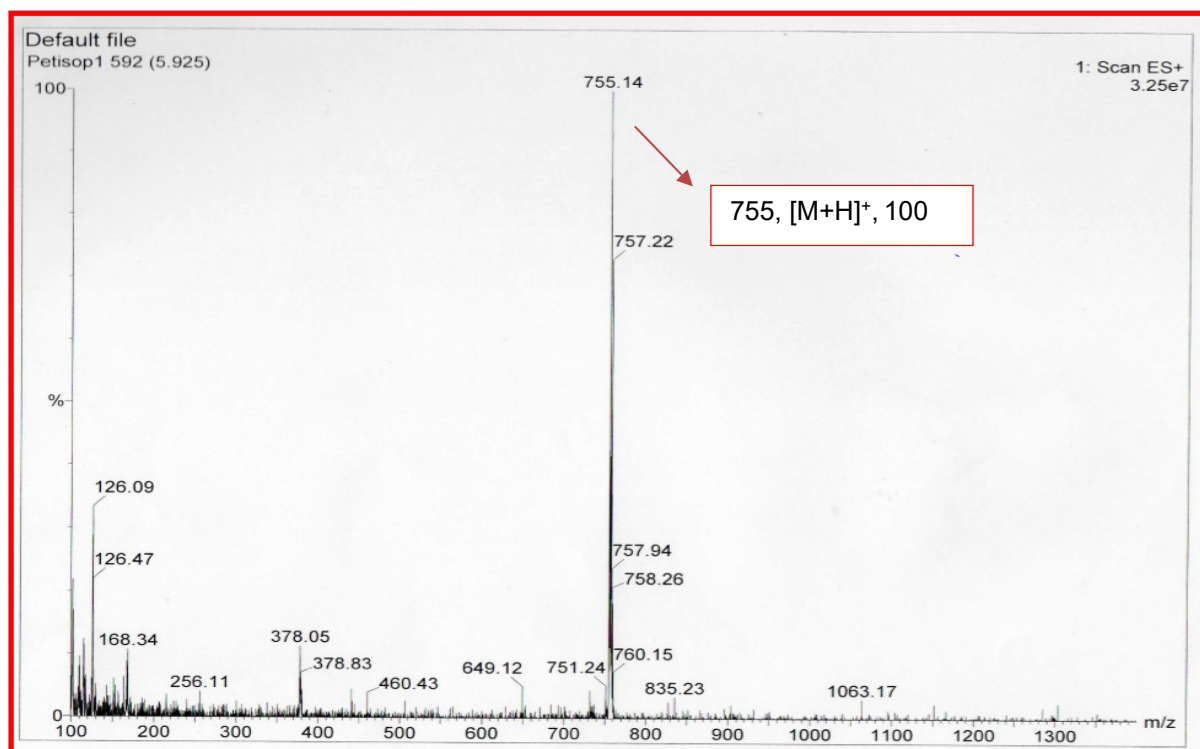

ESI-MS spectra of compound **4c**.



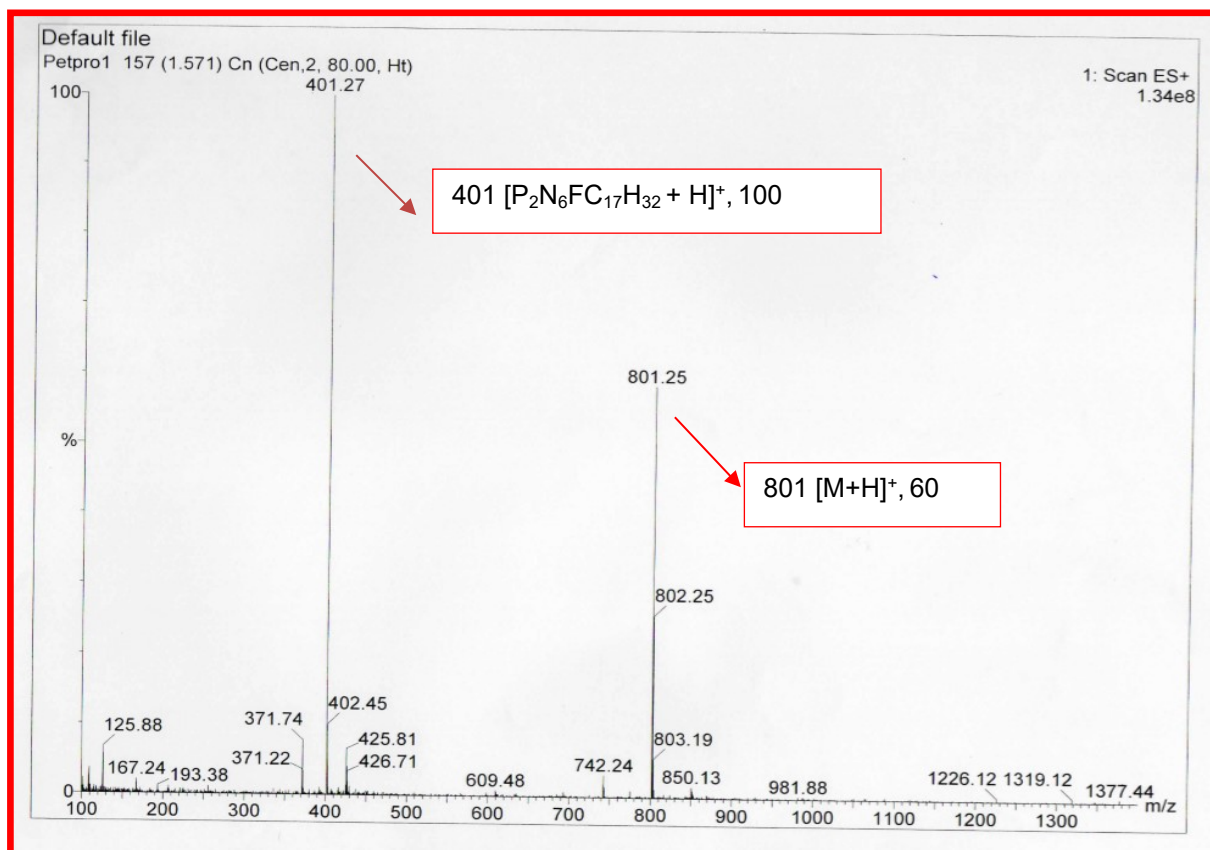

ESI-MS spectra of compound **4d**.

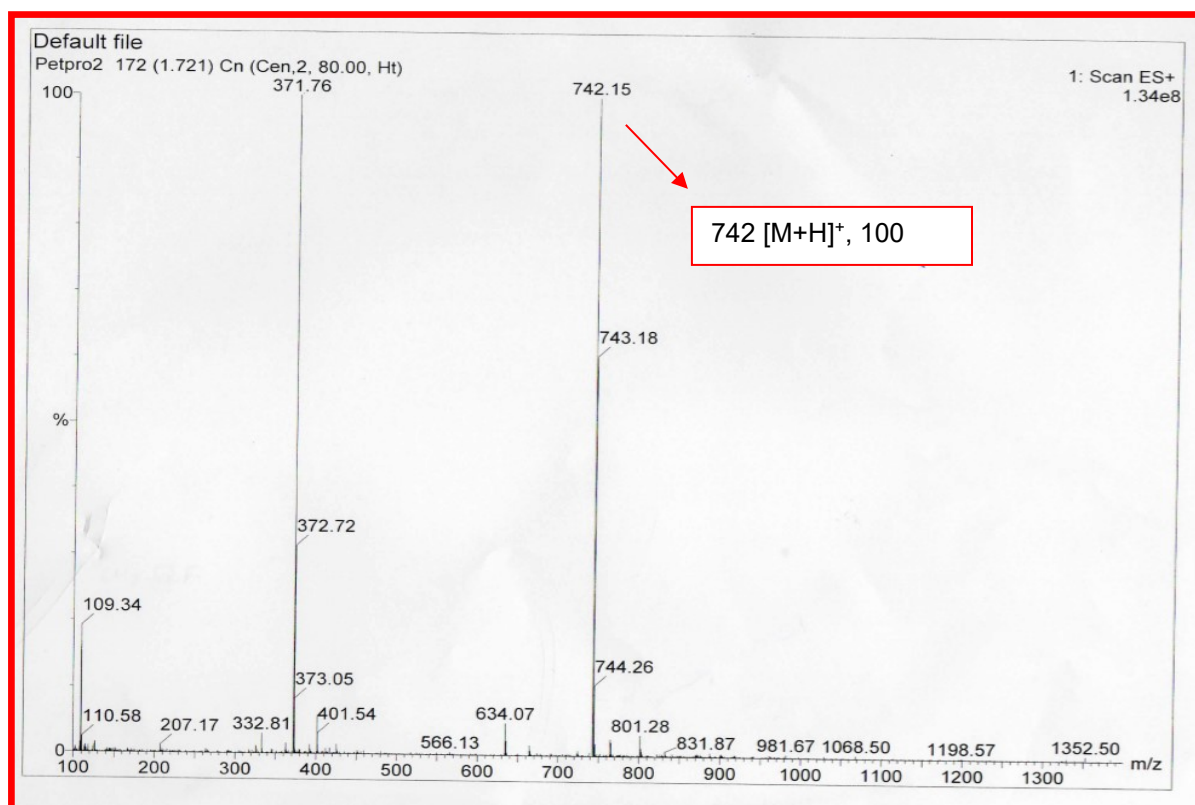

ESI-MS spectra of compound **5b**.

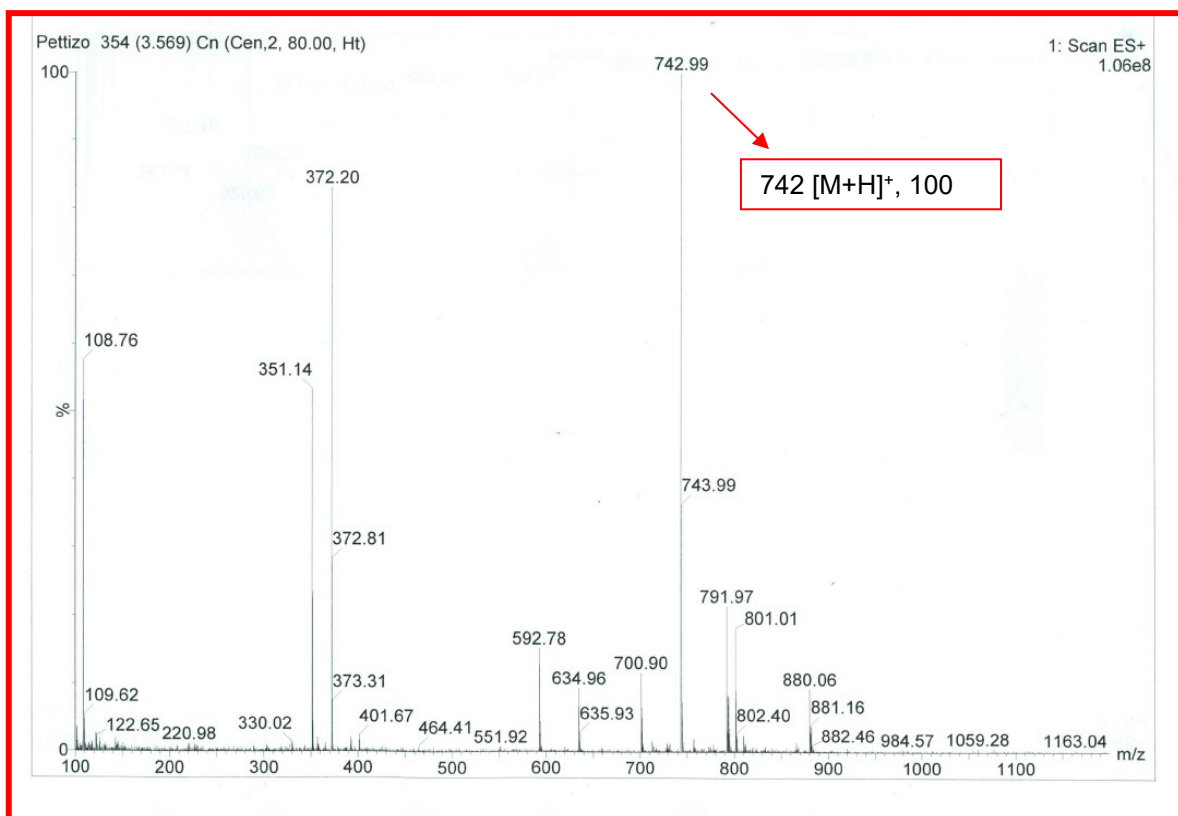

ESI-MS spectra of compound **5c**.

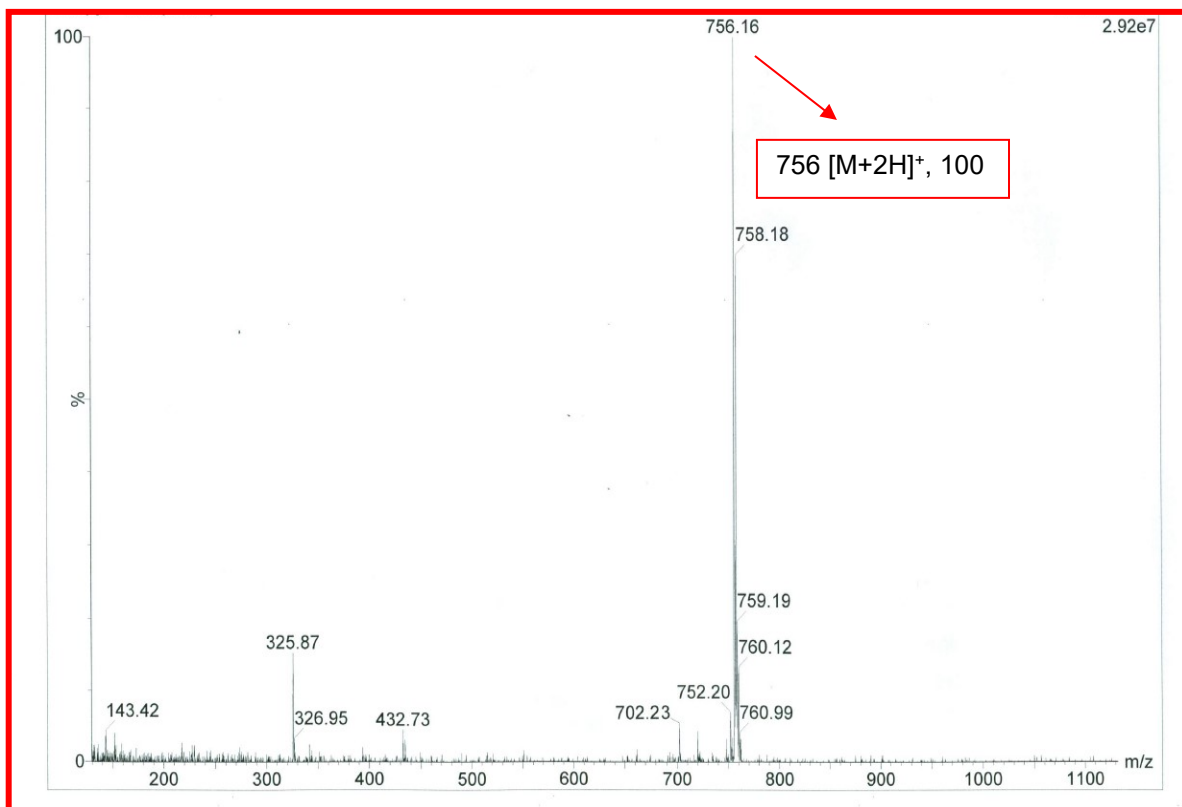

ESI-MS spectra of compound **4b**.

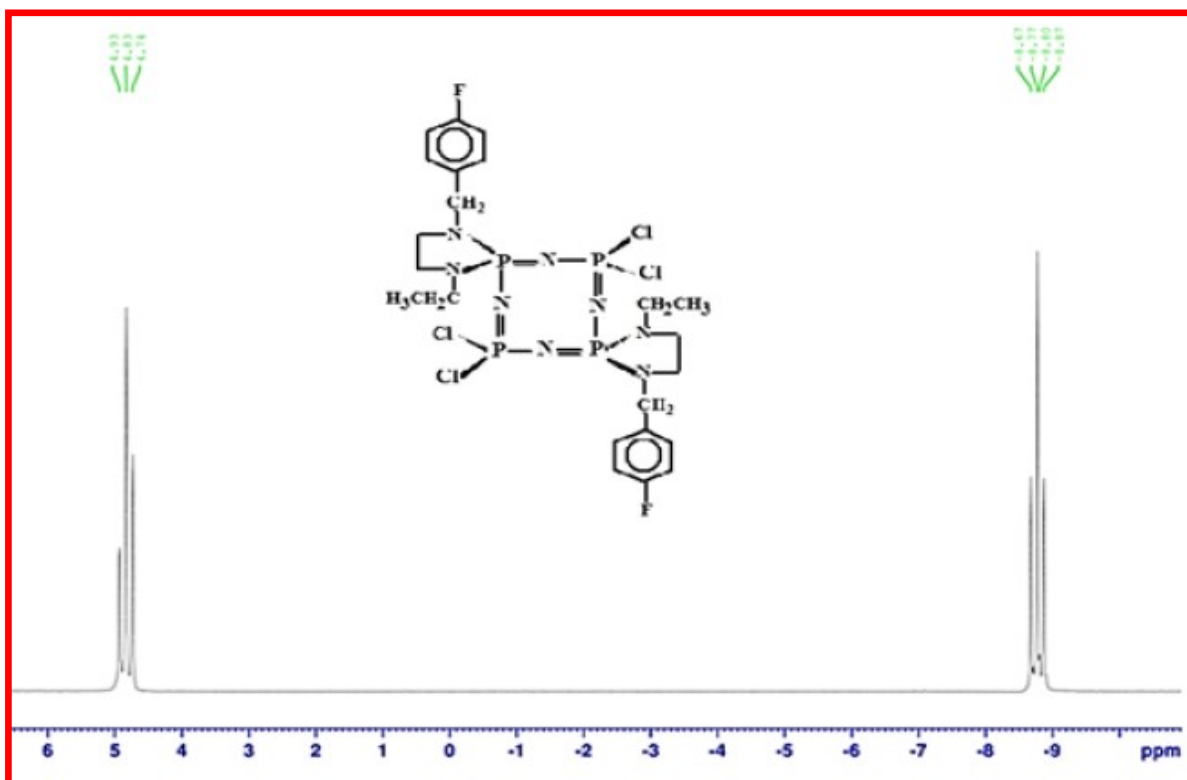

$^{31}\text{P}$  NMR spectrum of compound 2.

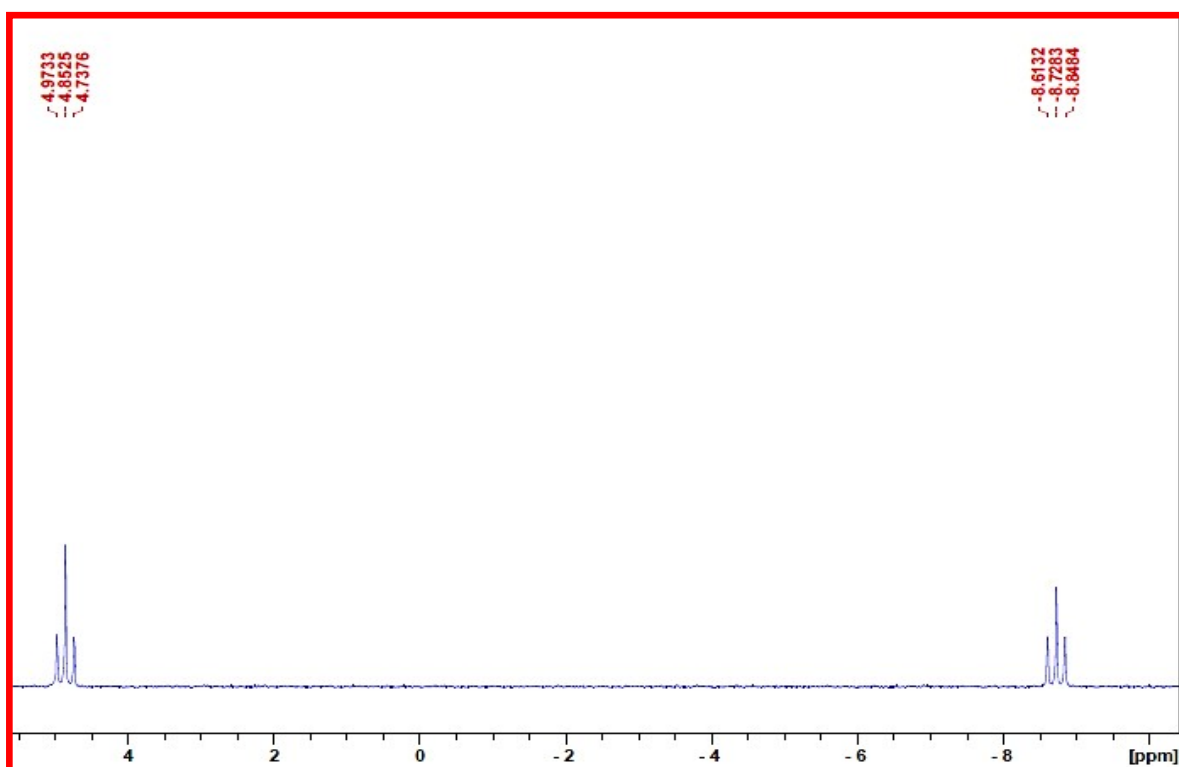

$^{31}\text{P}$  NMR spectrum of compound 3.

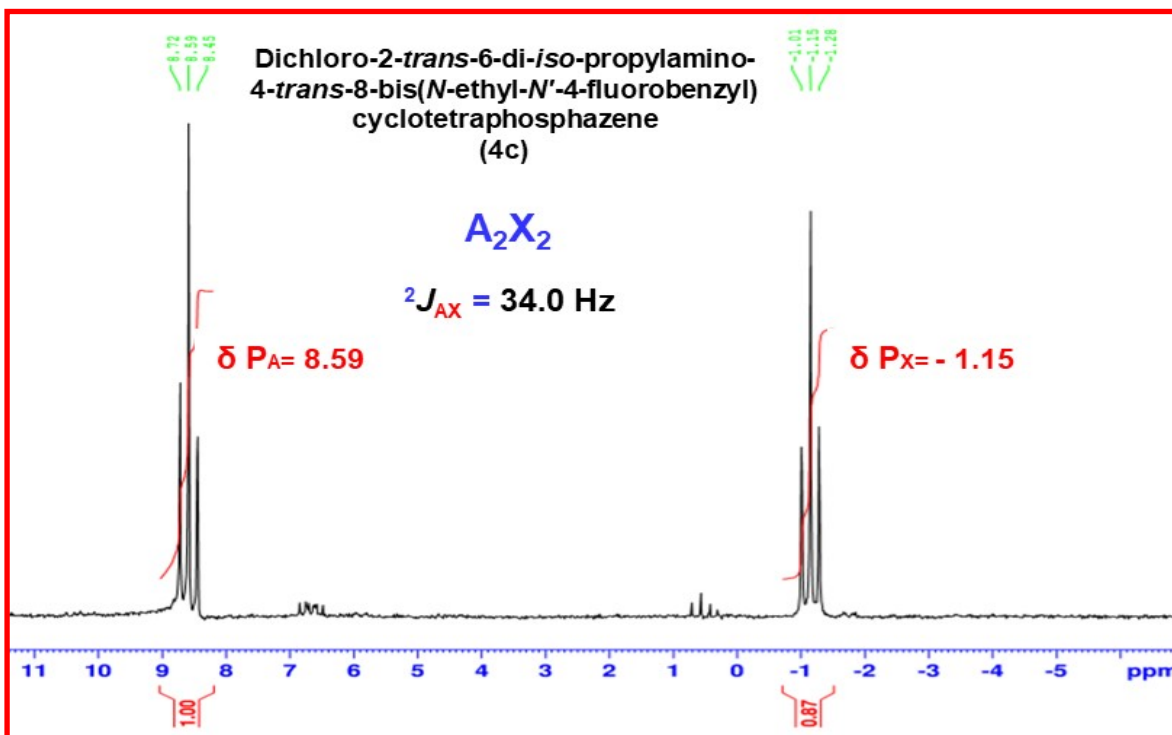

$^{31}\text{P}$  NMR spectrum of compound **4c**.

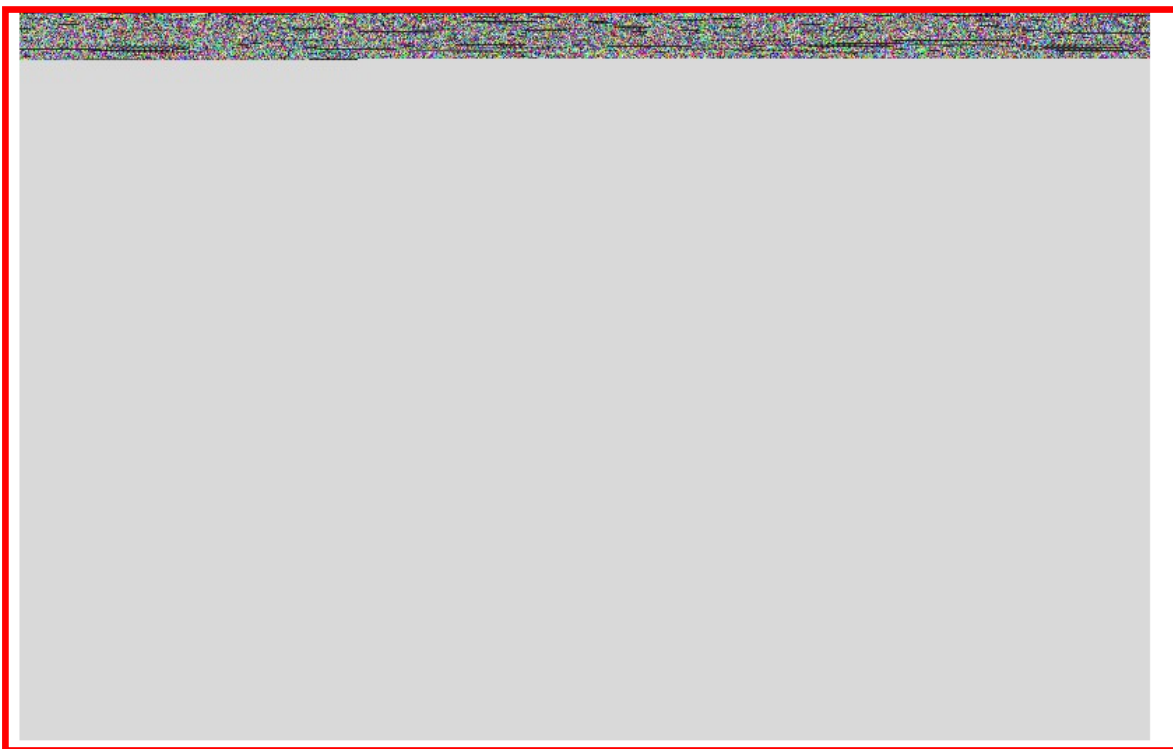

$^{31}\text{P}$  NMR spectrum of compound **4d**.

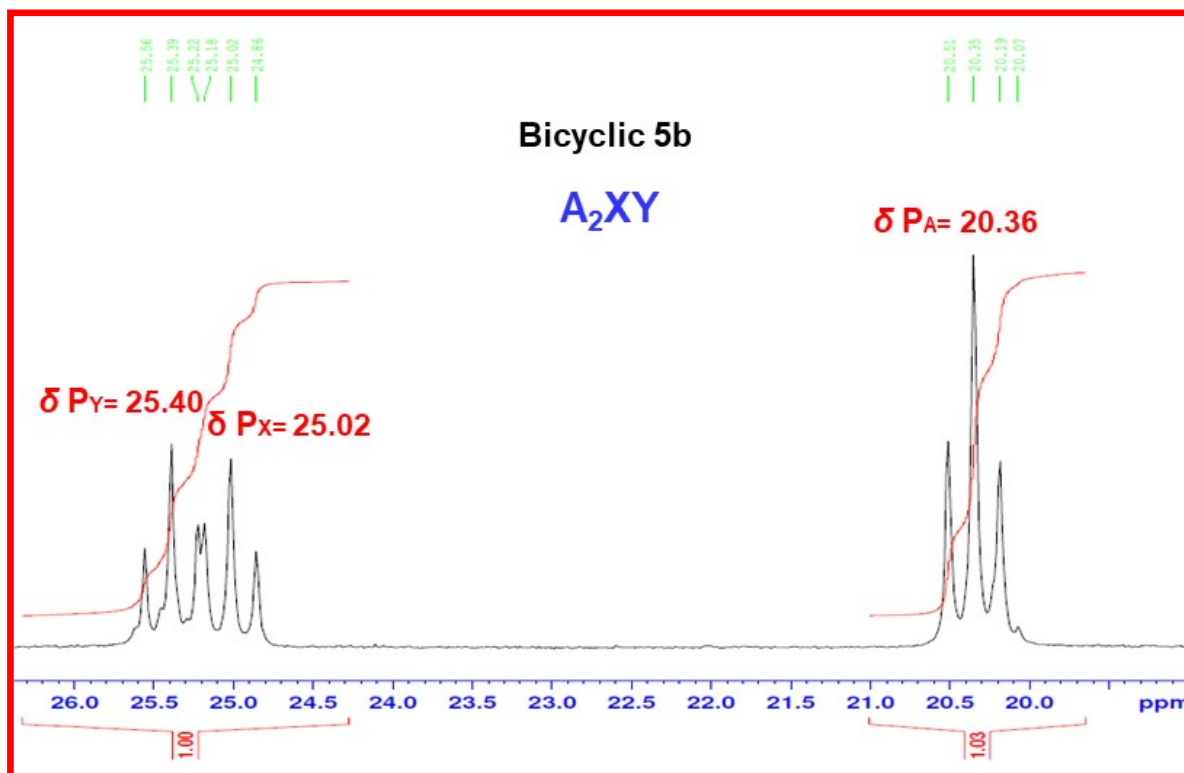

$^{31}\text{P}$  NMR spectrum of compound **5b**.

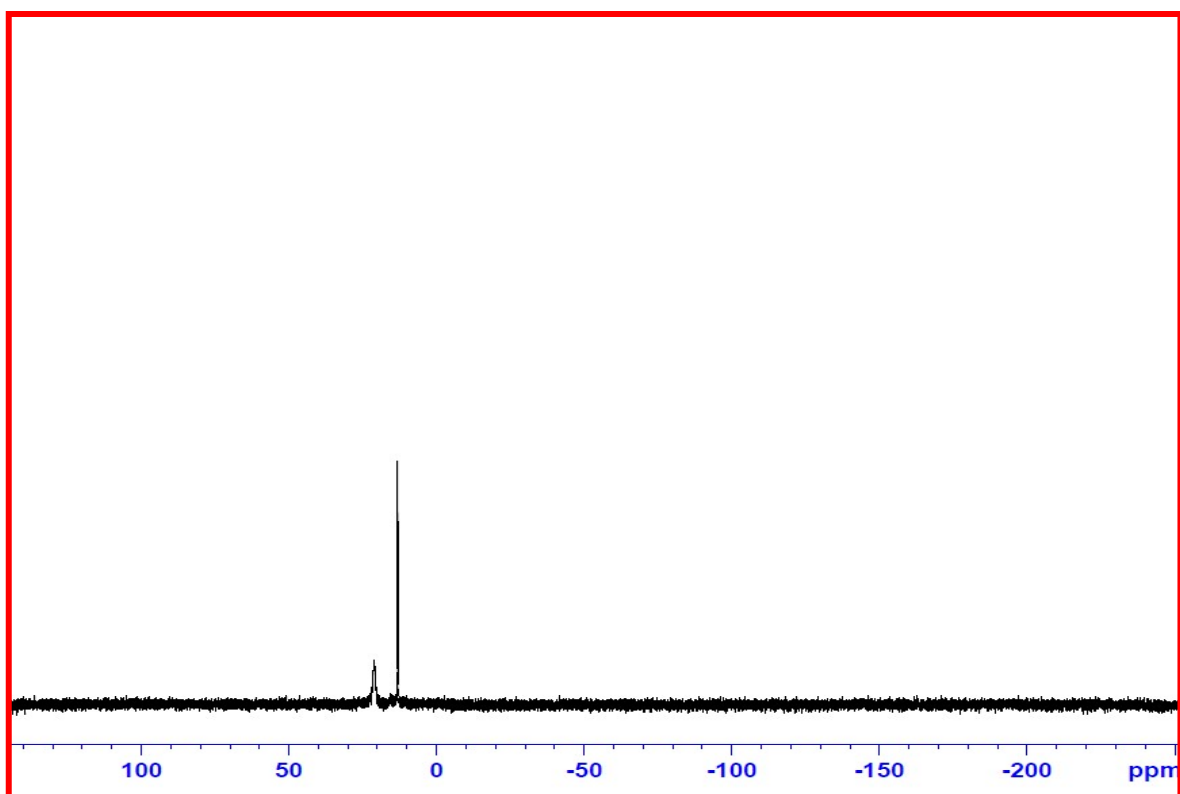

$^{31}\text{P}$  NMR spectrum of compound **5c**.

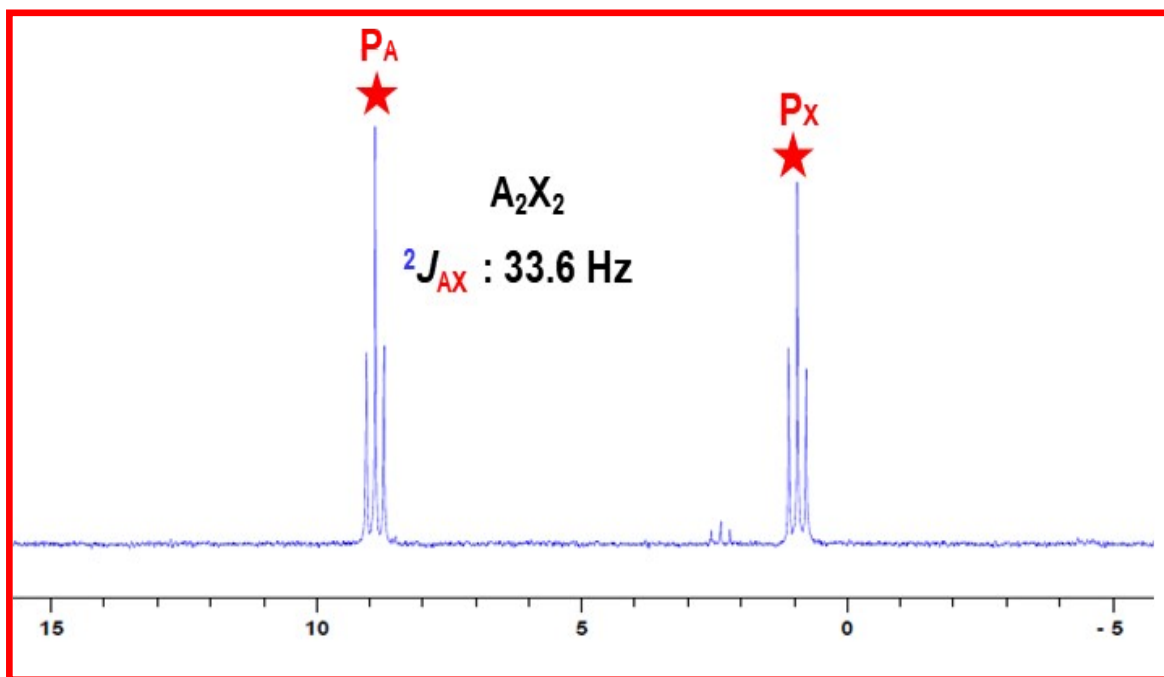

$^{31}\text{P}$  NMR spectrum of compound **4b**.

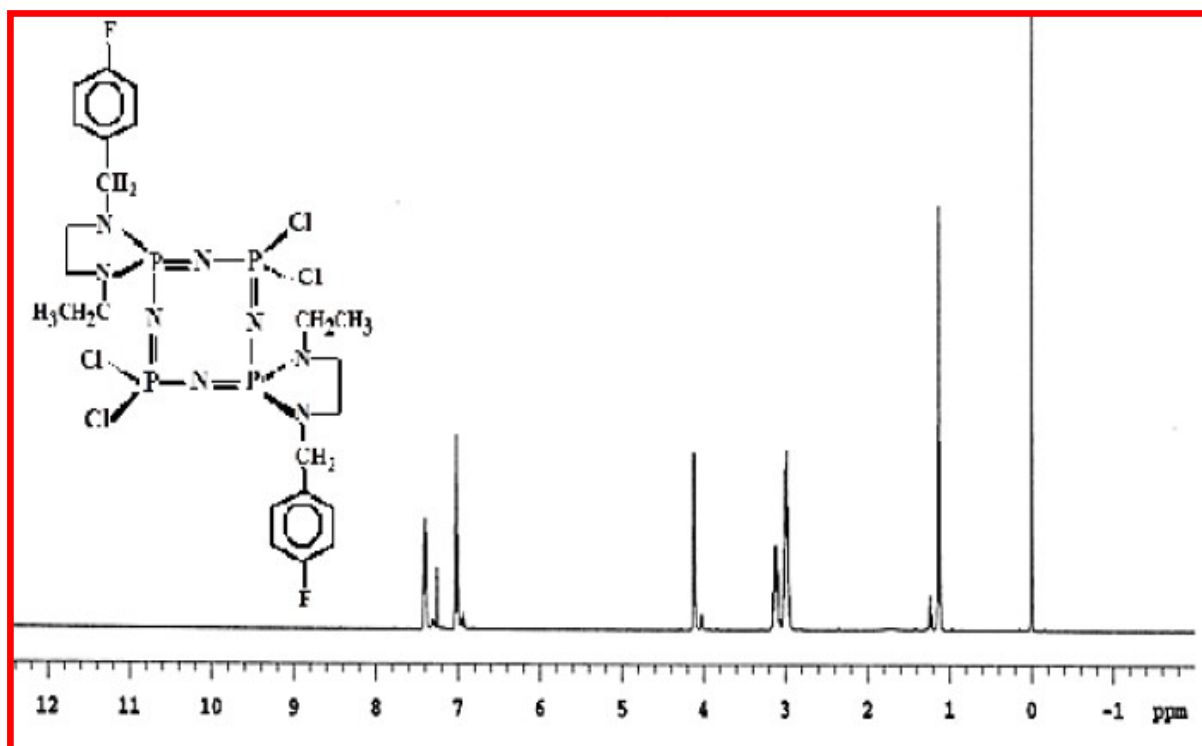

$^1\text{H}$  NMR spectrum of compound **2**.

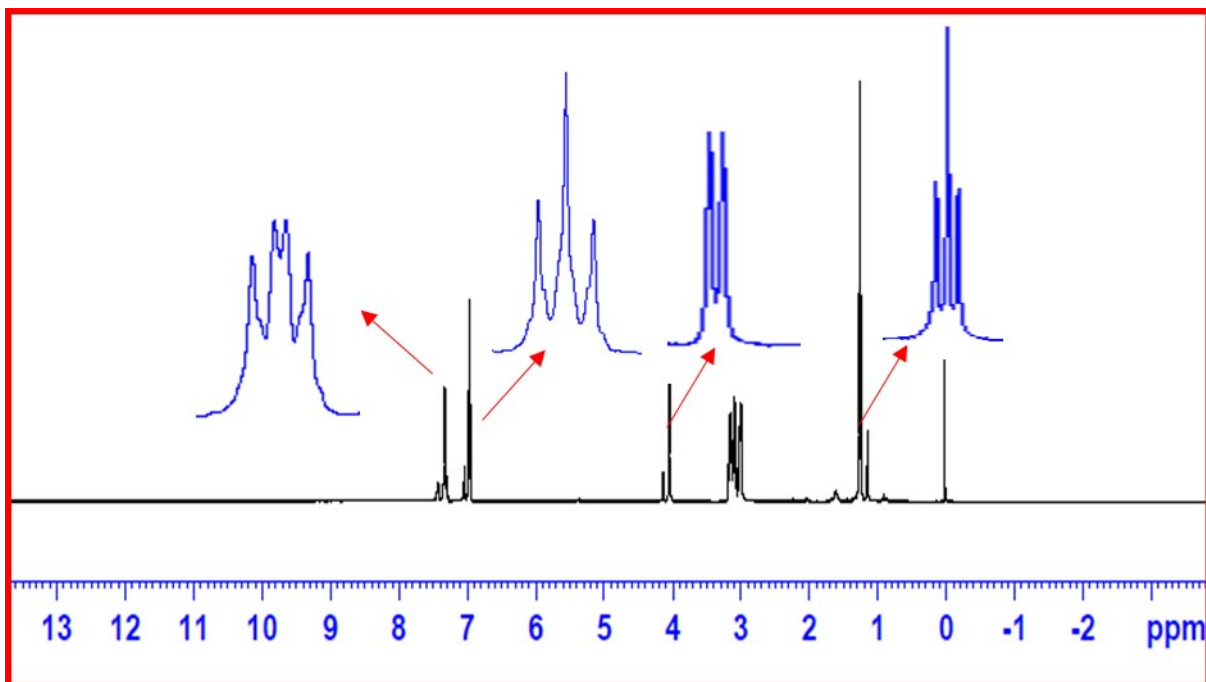

$^1\text{H}$  NMR spectrum of compound 3.

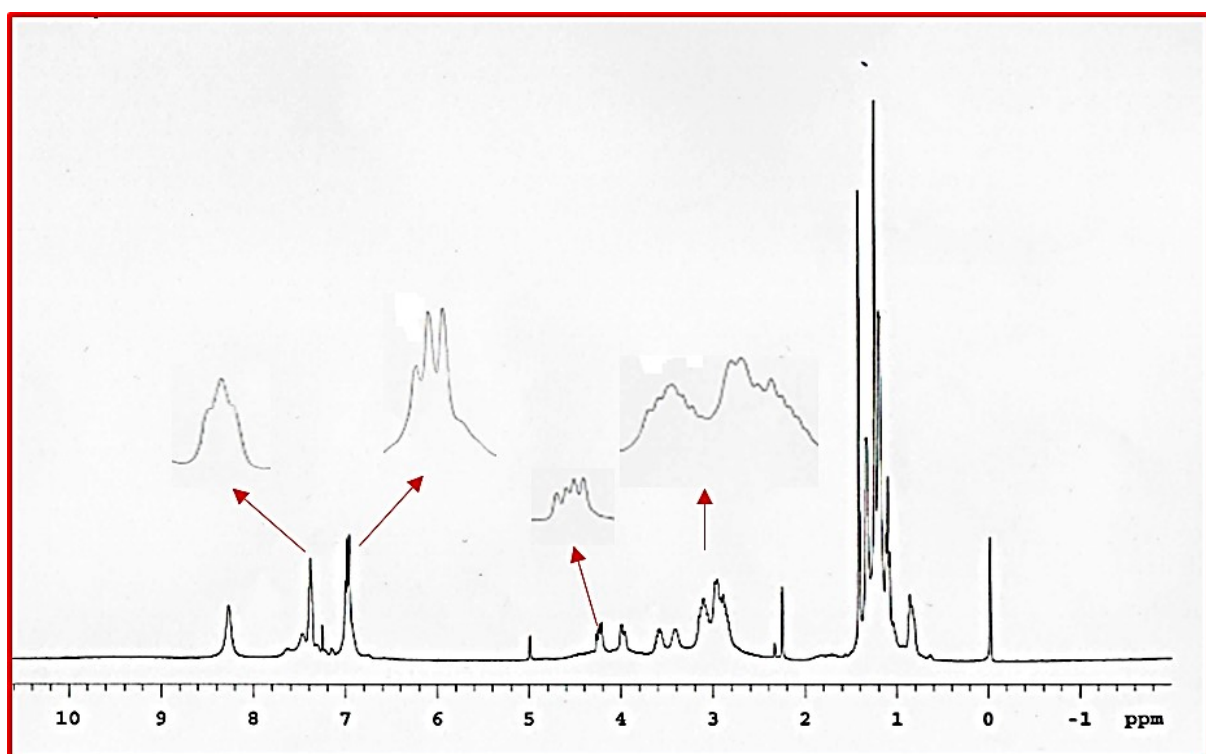

$^1\text{H}$  NMR spectrum of compound 4c.

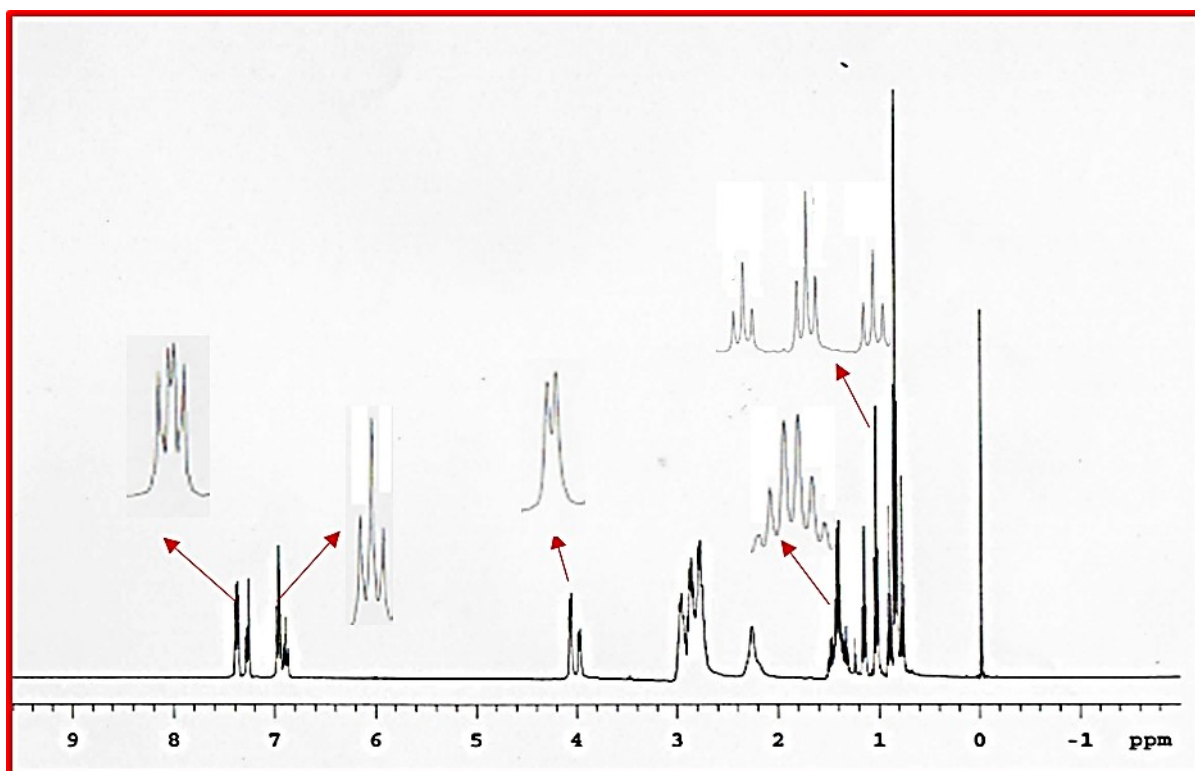

$^1\text{H}$  NMR spectrum of compound **4d**.

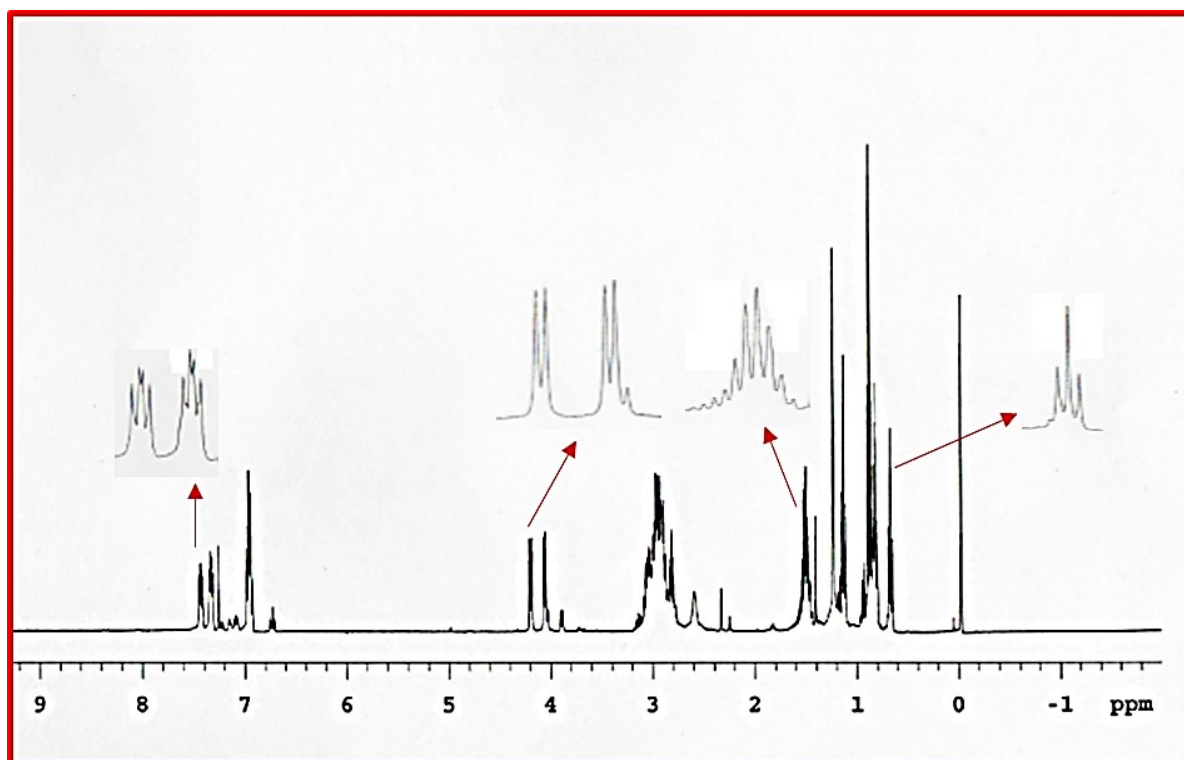

$^1\text{H}$  NMR spectrum of compound **5b**.



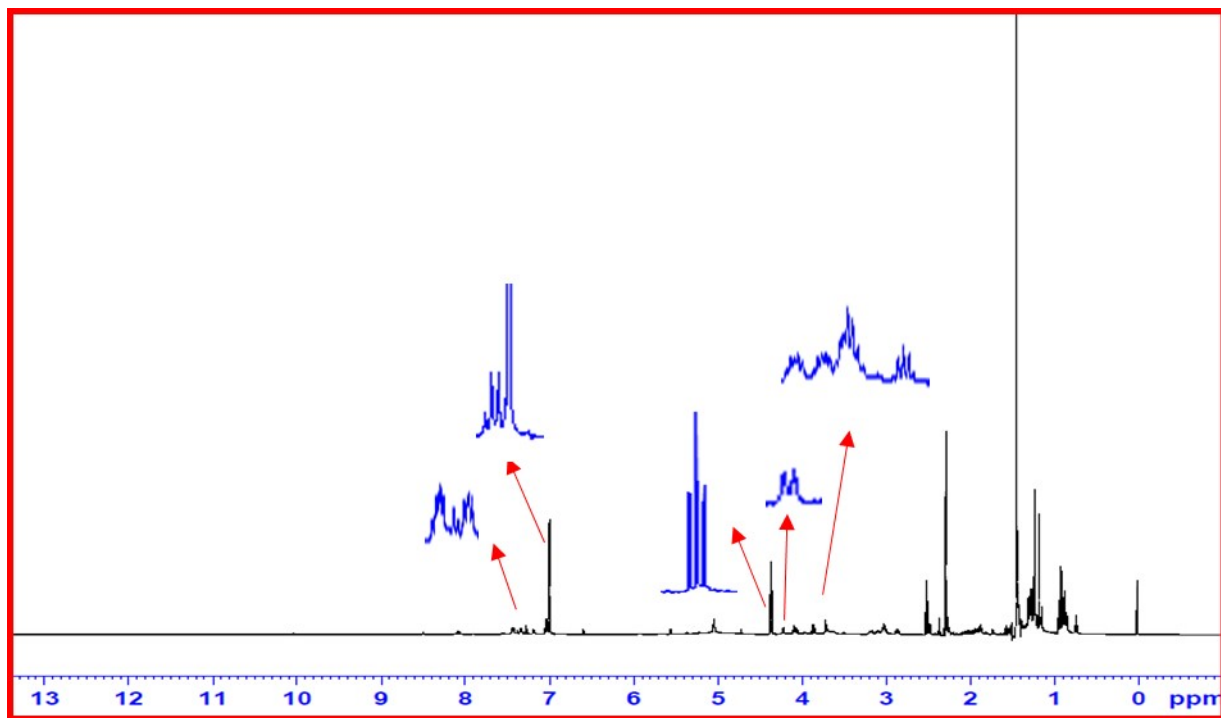

$^1\text{H}$  NMR spectrum of compound **5c**.

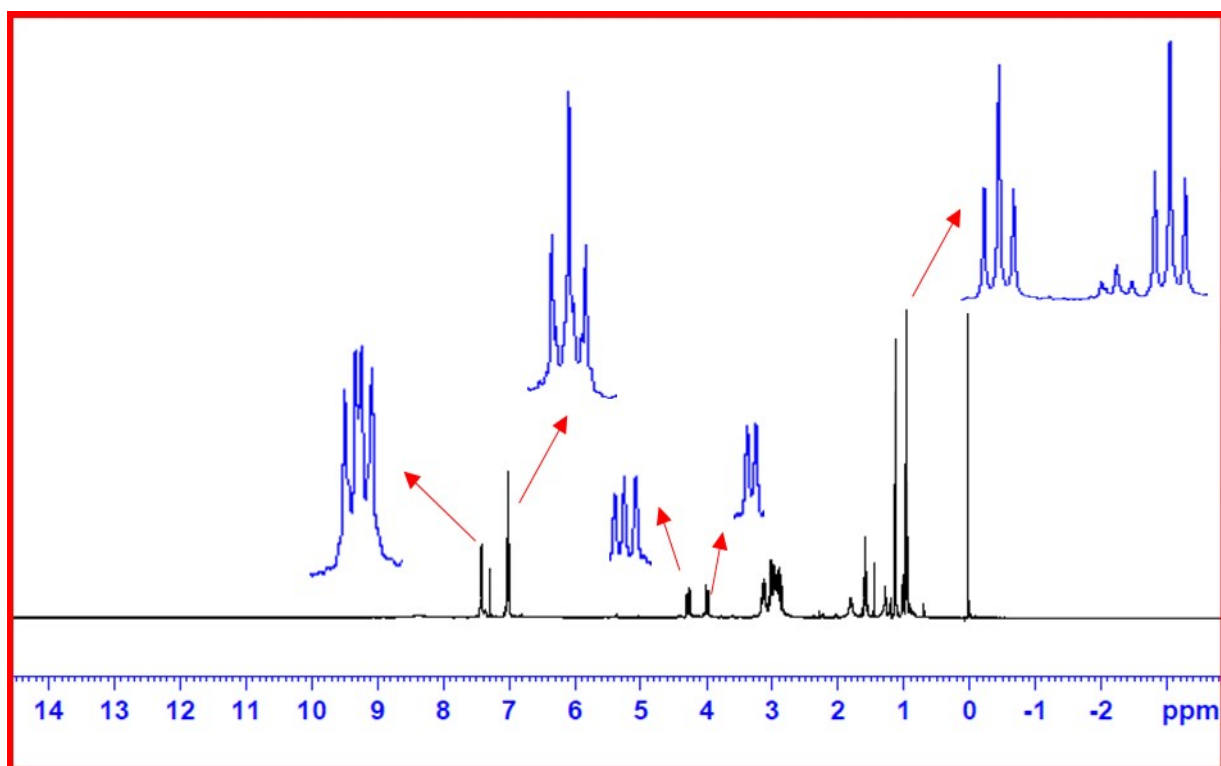

$^1\text{H}$  NMR spectrum of compound **4b**.

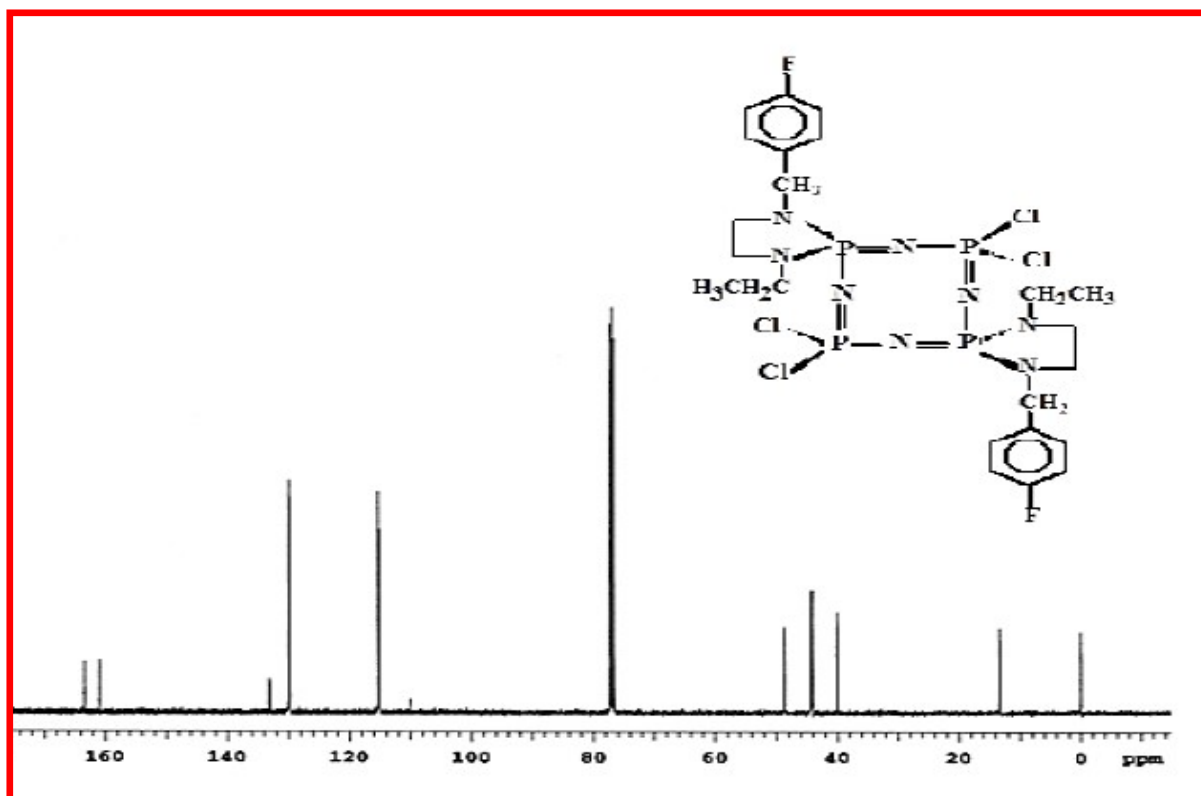

$^{13}\text{C}$  NMR spectrum of compound 2.

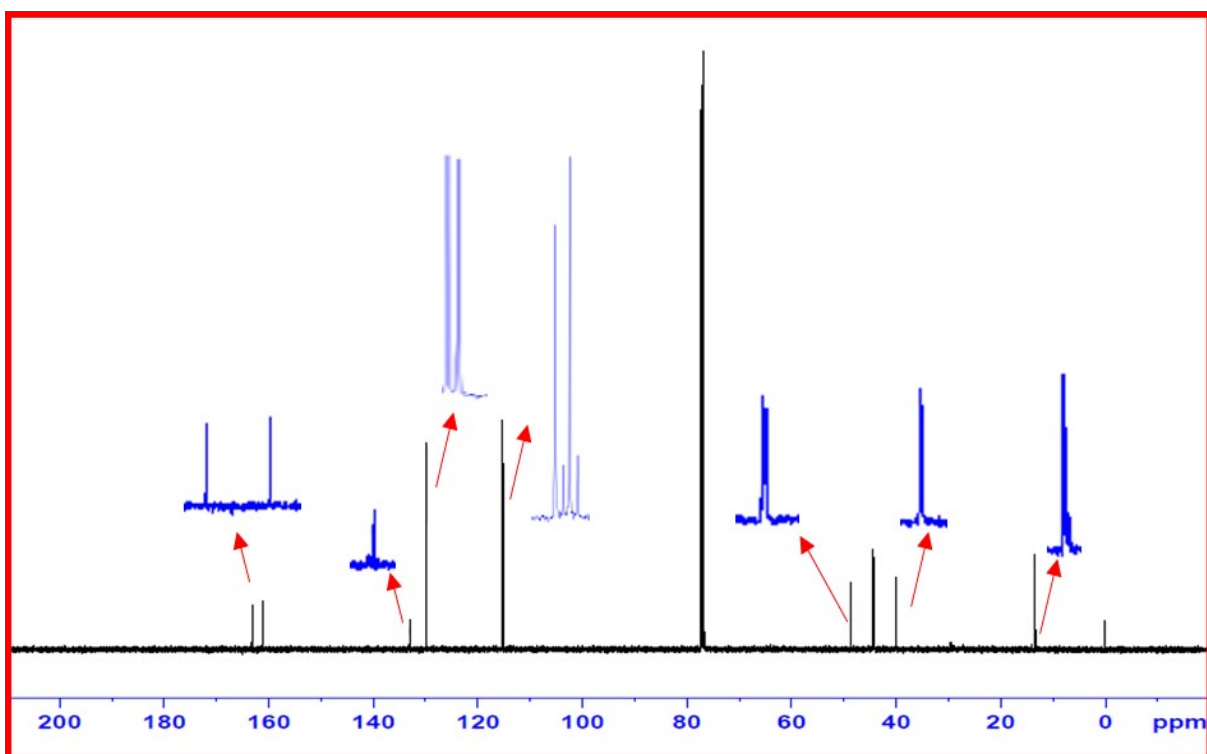

$^{13}\text{C}$  NMR spectrum of compound 3.

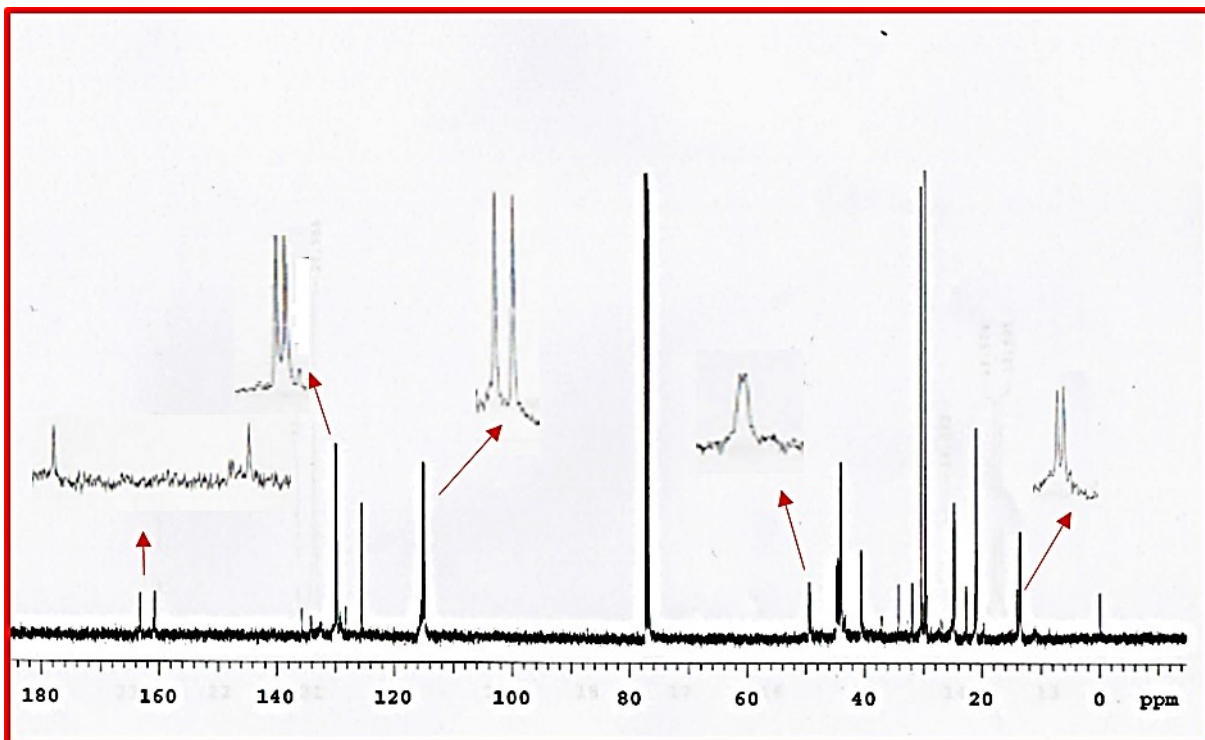

$^{13}\text{C}$  NMR spectrum of compound **4c**.

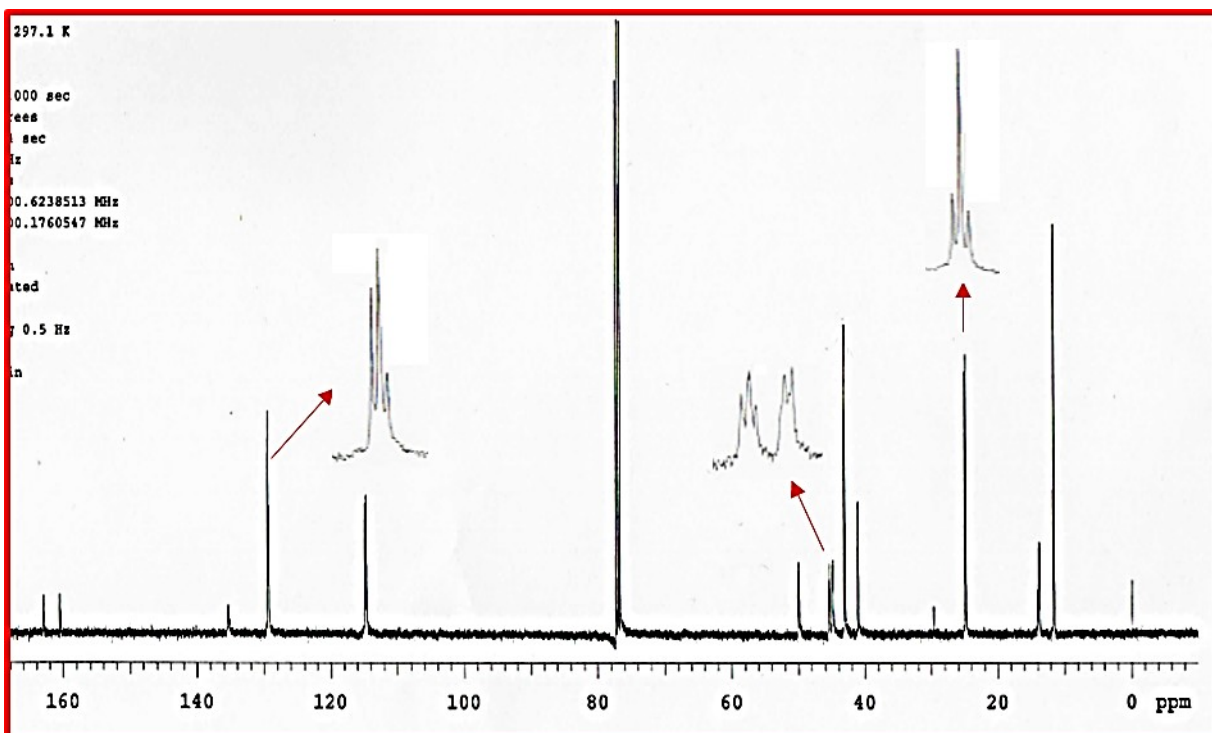

$^{13}\text{C}$  NMR spectrum of compound **4d**.

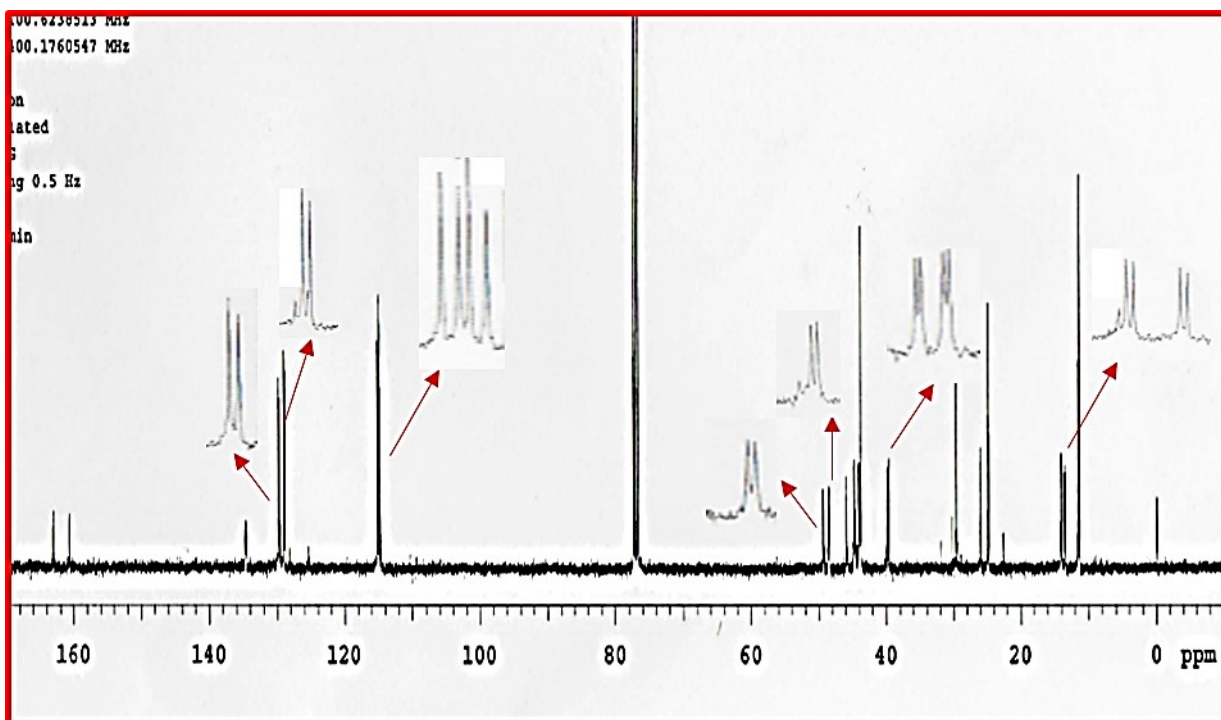

<sup>13</sup>C NMR spectrum of compound **5b**.

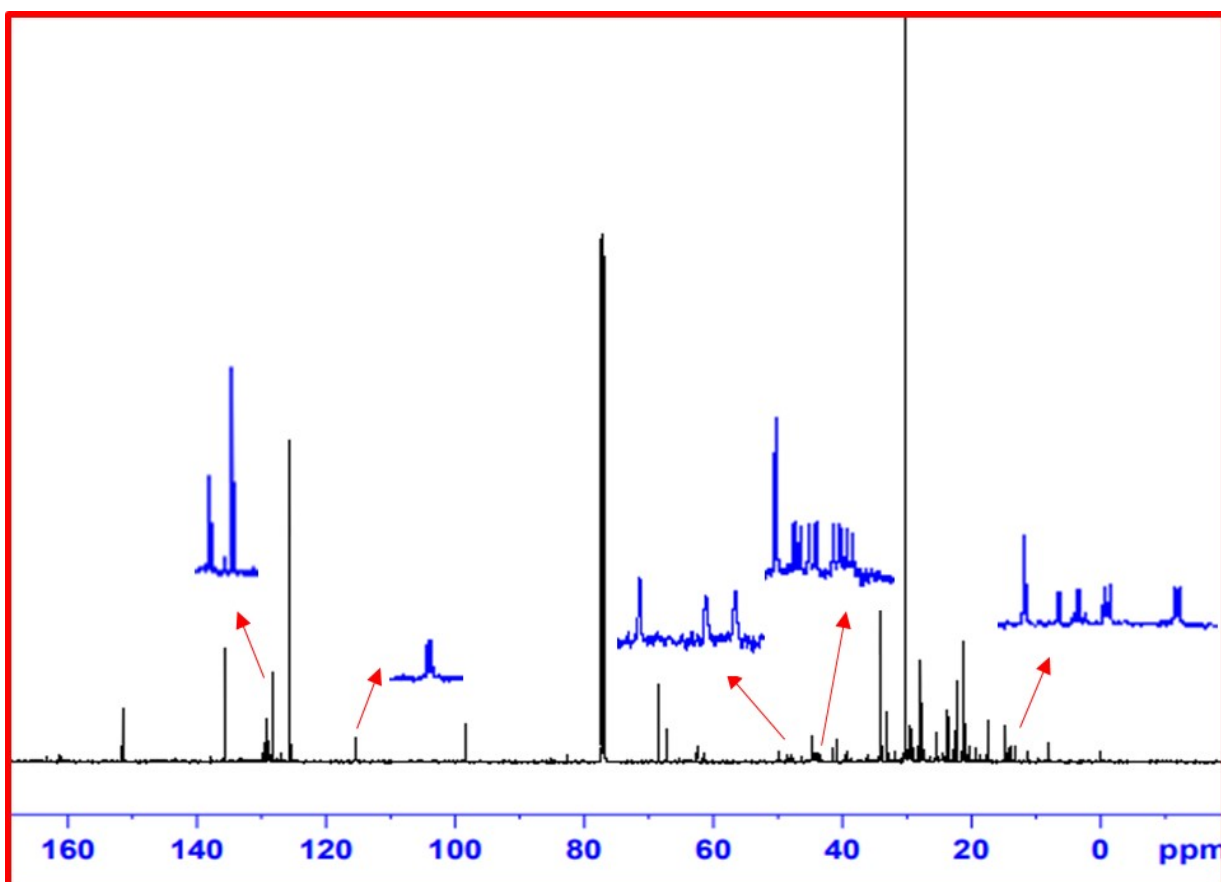

<sup>13</sup>C NMR spectrum of compound **5c**.

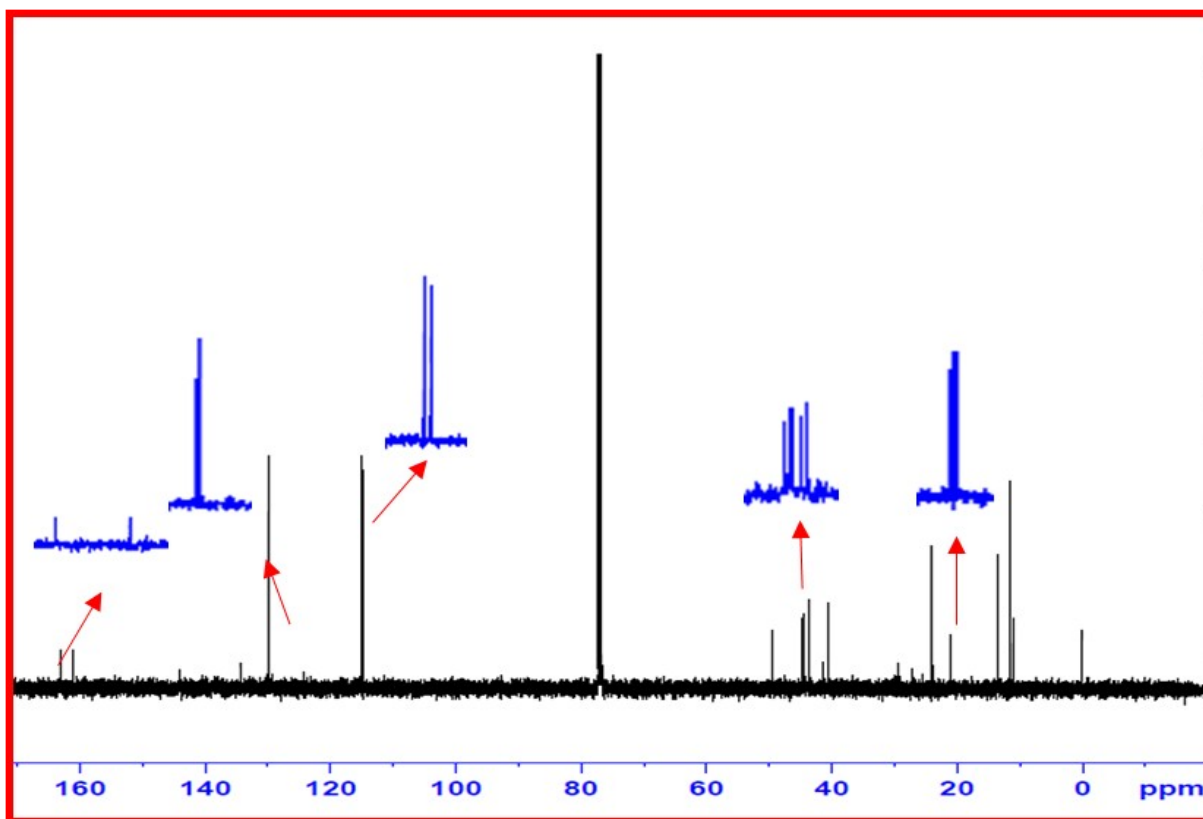

<sup>13</sup>C NMR spectrum of compound **4b**.

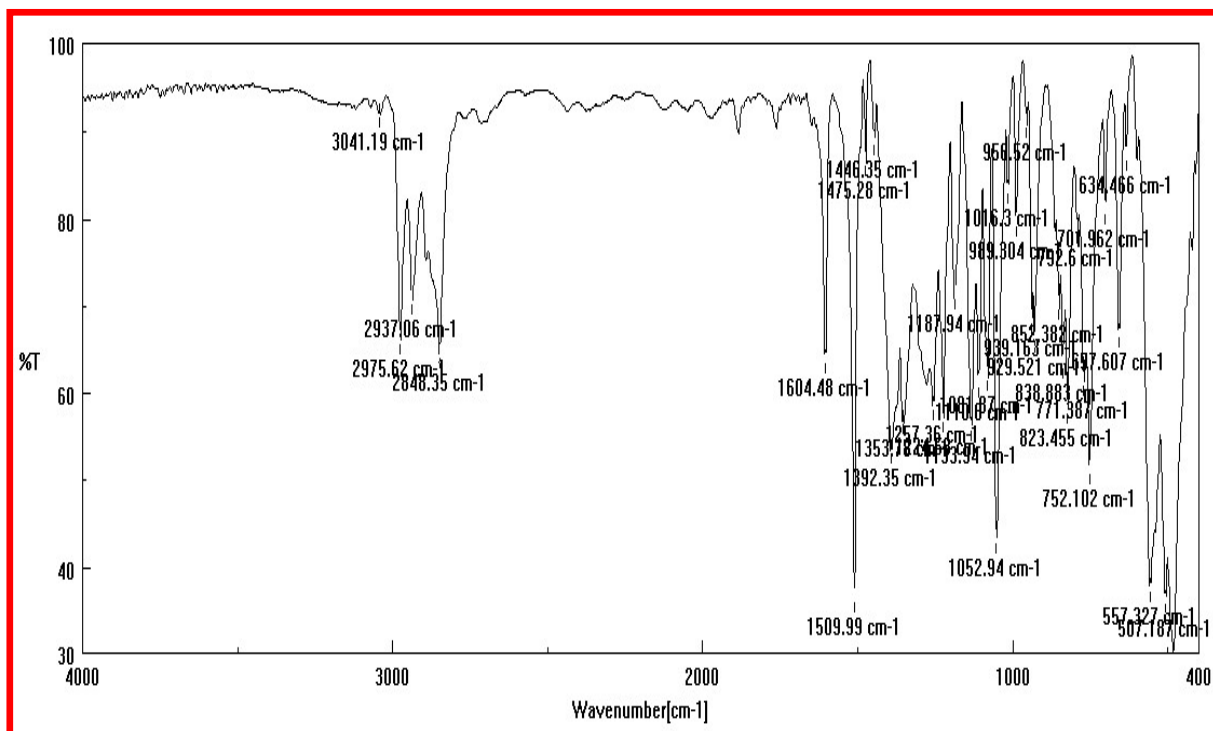

IR spectrum of compound **2**.

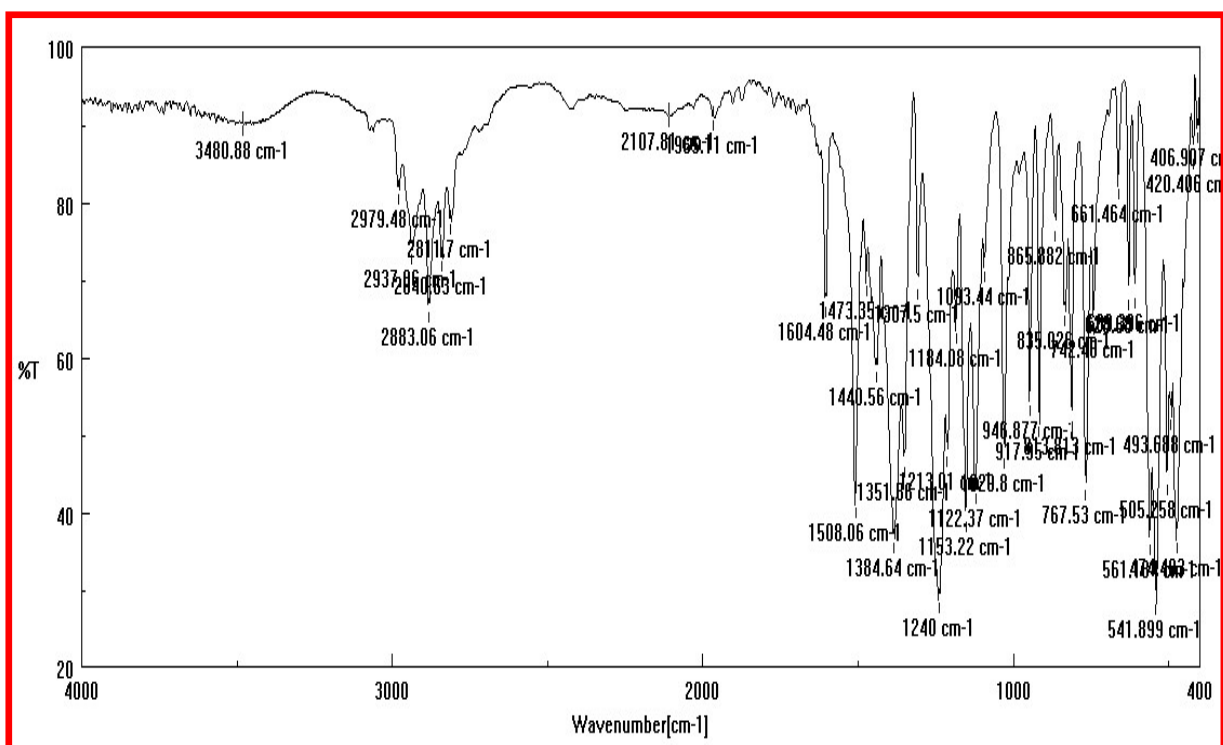

IR spectrum of compound 3.

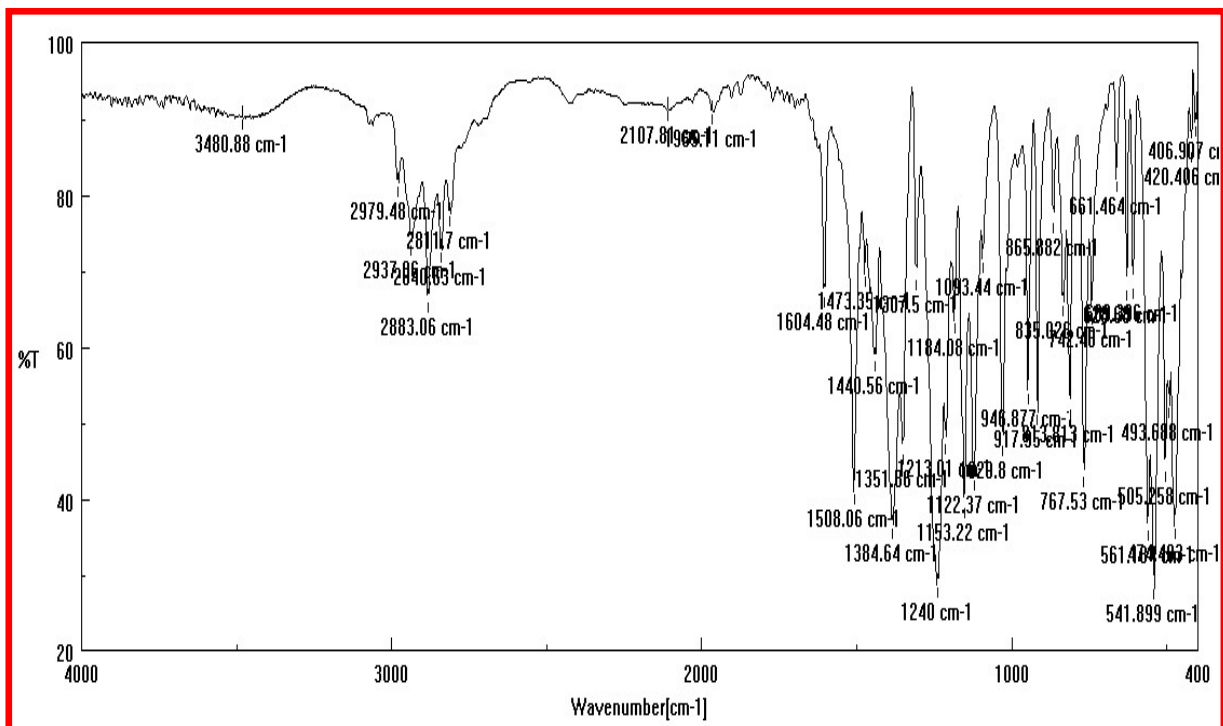

IR spectrum of compound 4c.

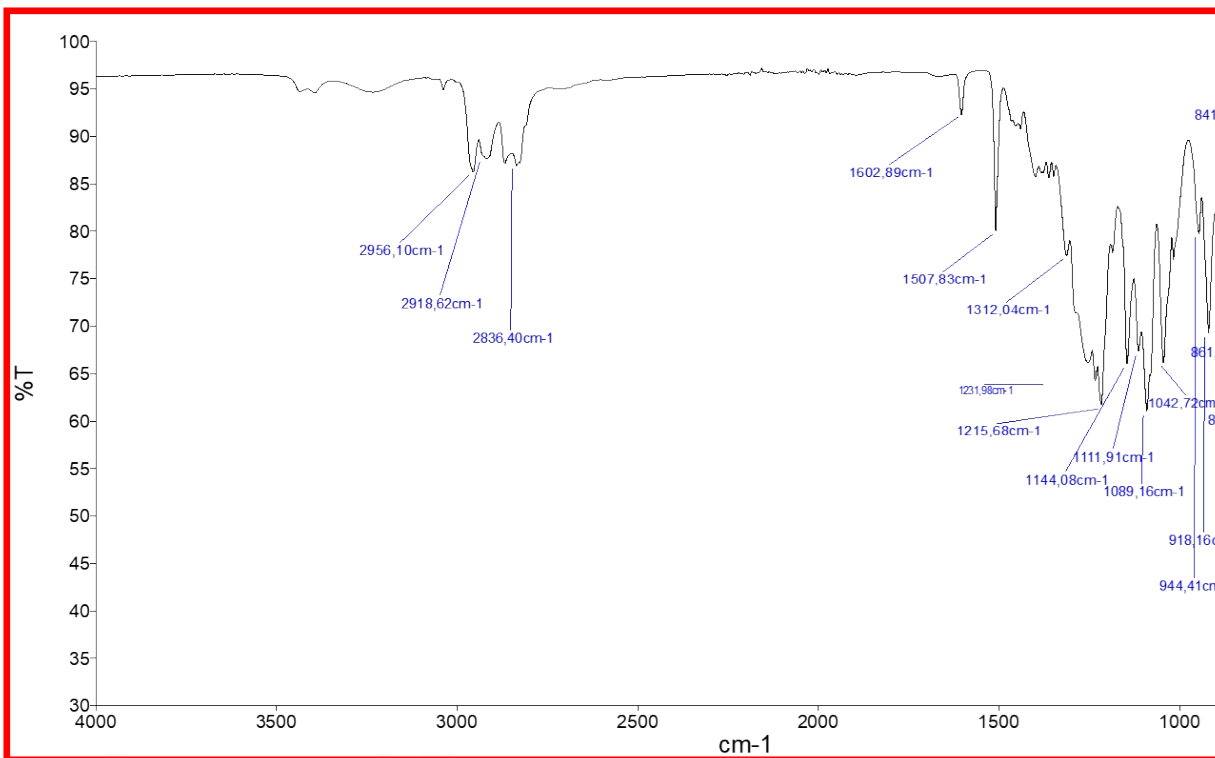

IR spectrum of compound **4d**.

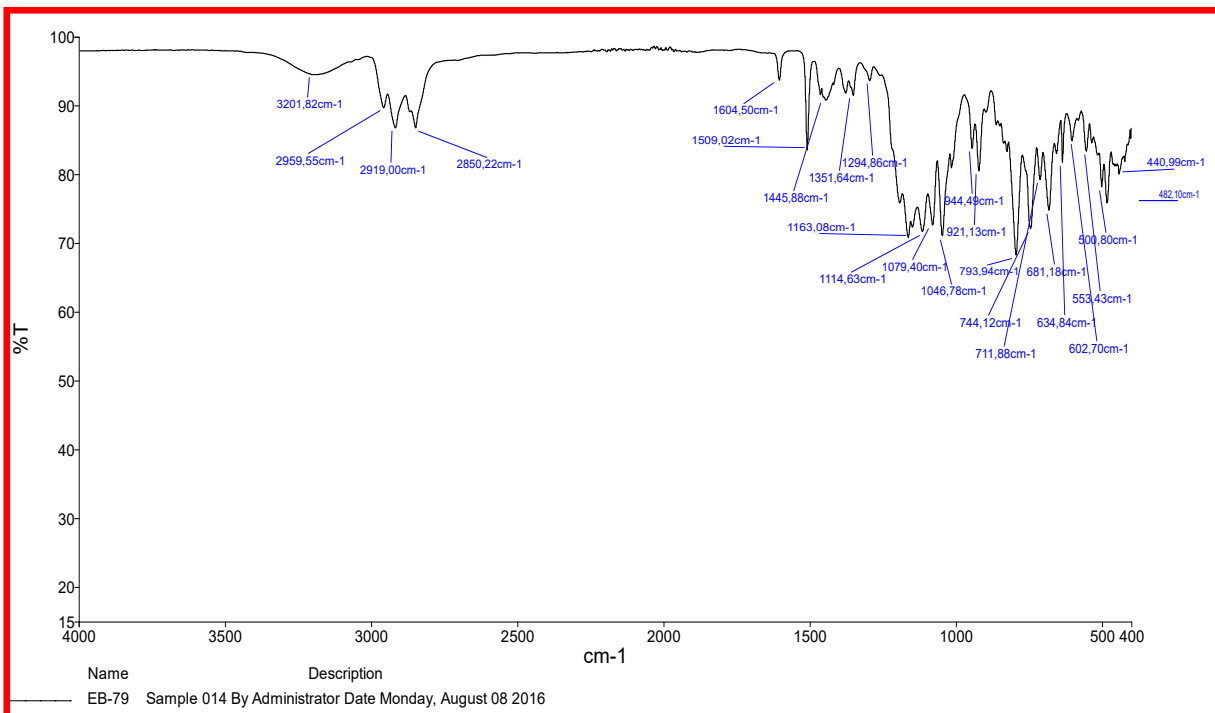

IR spectrum of compound **5b**.

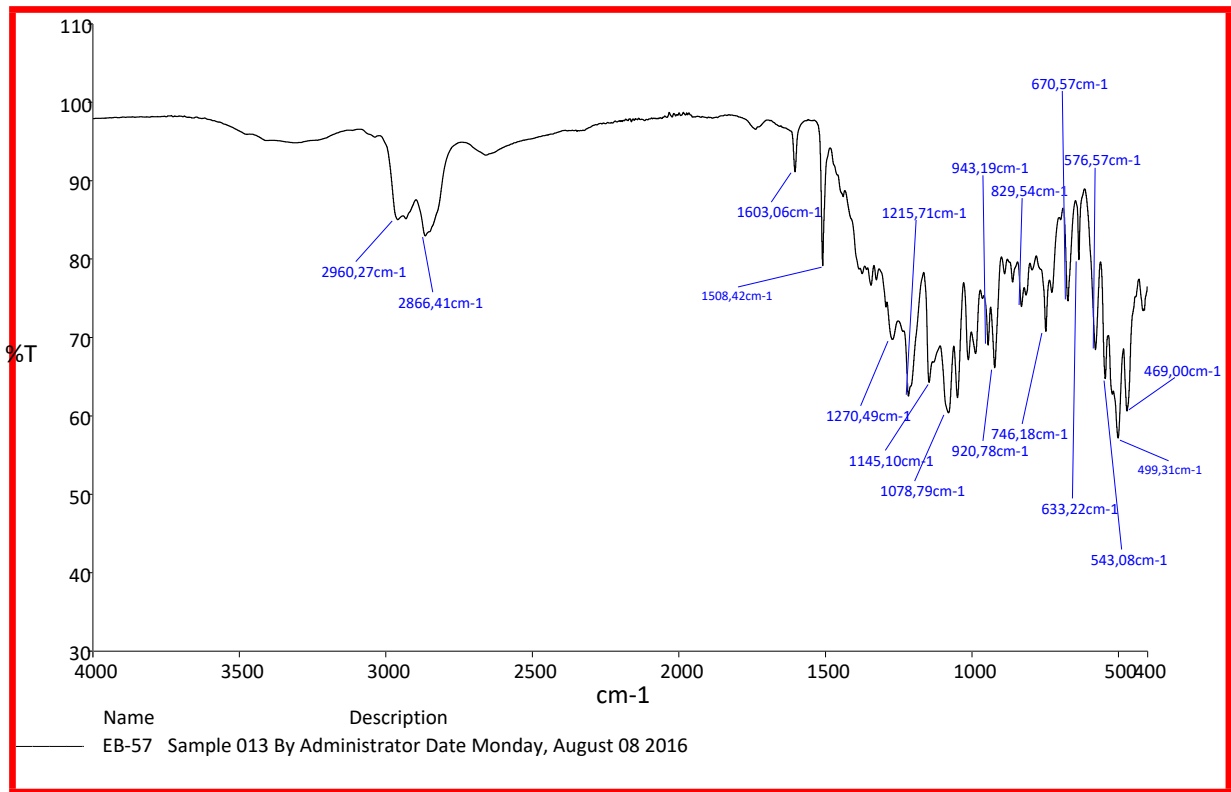

IR spectrum of compound **5c**.

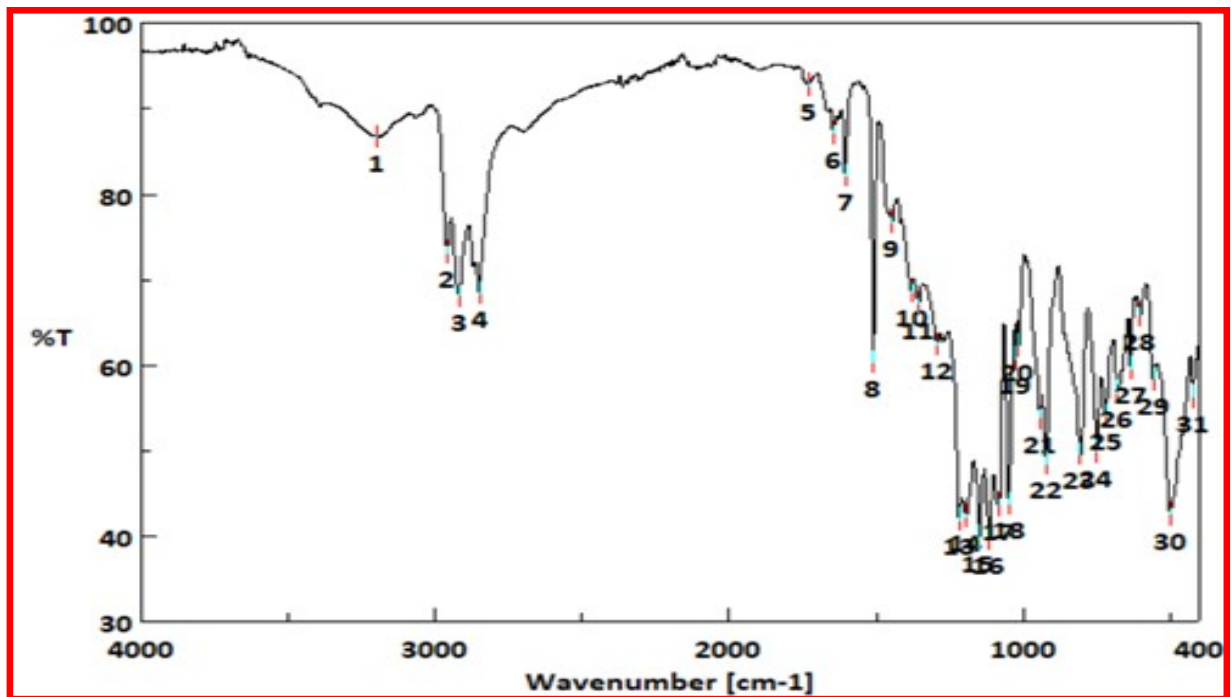



| [ Result of Peak Picking ] |          |           |     |          |           |
|----------------------------|----------|-----------|-----|----------|-----------|
| No.                        | Position | Intensity | No. | Position | Intensity |
| 1                          | 3196.43  | 86.7038   | 2   | 2959.23  | 73.1876   |
| 3                          | 2917.77  | 68.121    | 4   | 2849.31  | 68.4145   |
| 5                          | 1729.83  | 92.7712   | 6   | 1645.95  | 87.2157   |
| 7                          | 1603.52  | 82.1488   | 8   | 1508.06  | 60.2675   |
| 9                          | 1445.39  | 76.7794   | 10  | 1377.89  | 68.6557   |
| 11                         | 1352.82  | 67.1778   | 12  | 1291.11  | 62.3416   |
| 13                         | 1216.86  | 41.8935   | 14  | 1193.72  | 42.2143   |
| 15                         | 1148.4   | 39.8204   | 16  | 1113.69  | 39.6788   |
| 17                         | 1080.91  | 43.6013   | 18  | 1047.16  | 43.6733   |
| 19                         | 1027.87  | 60.7533   | 20  | 1014.37  | 62.2738   |
| 21                         | 941.092  | 53.7664   | 22  | 919.879  | 48.4704   |
| 23                         | 804.171  | 49.5277   | 24  | 747.281  | 49.8641   |
| 25                         | 717.39   | 54.0891   | 26  | 678.82   | 56.7481   |
| 27                         | 633.501  | 59.5565   | 28  | 600.717  | 65.9007   |
| 29                         | 556.363  | 58.3373   | 30  | 498.509  | 42.4557   |
| 31                         | 419.442  | 56.2487   |     |          |           |

IR spectrum of compound **4b**.

## Section S2. Single Crystal X-ray Structure Determinations

The crystallographic data were collected on a Bruker APEX II QUAZAR three-circle diffractometer by Mo K $\alpha$  radiation ( $\lambda=0.71073$  Å) at T = 173(2) K (for **2**) and 125(2) K (for **4c**). No absorption correction was applied. The structures of **2** and **4c** were solved using direct methods<sup>1</sup> and refined by full-matrix least-squares against F<sup>2</sup> using all data.<sup>2</sup> All non-H atoms were refined anisotropically. The molecular and packing diagrams together with the ring conformations of **2** and **4c** were drawn by the ORTEP-3 program incorporated in the WinGX package.<sup>3</sup> The H atom positions were calculated geometrically at distances of 0.93 Å (aromatic CH), 0.97 Å (CH<sub>2</sub>) and 0.96 Å (CH<sub>3</sub>) (in **2**) and 0.95 Å (aromatic CH), 1.00 Å (methine CH), 0.99 Å (CH<sub>2</sub>) and 0.98 Å (CH<sub>3</sub>) (in **4c**) from the parent C atoms; a riding model was used during the refinement process and the U<sub>iso</sub>(H) values were constrained to be xU<sub>eq</sub>(carrier atom), where x = 1.2 (for CH and CH<sub>2</sub>) and x = 1.5 (for CH<sub>3</sub>). In **4c**, the NH hydrogen (H5) atom is located in a difference Fourier map, and refined freely.

### References

- (1) G. M. Sheldrick, *Acta Crystallogr. Sect. A.*, 2015a, **71**, 3-8.
- (2) G. M. Sheldrick, *Acta Crystallogr. Sect. C.*, 2015b, **71**, 3-8.
- (3) L. J. Farrugia, *J. Appl. Cryst.*, 2012, **45**, 849-854.
